# Supplementary material for: Genome-scale metabolic modeling of responses to polymyxins in Pseudomonas aeruginosa
Source: PubMed Central journal article supplement (PMC6333913; doi:10.1093/gigascience/giy021), 2018-03-13
Supplement: giy021_giga-d-17-00272_original_submission.pdf [file giy021_giga-d-17-00272_original_submission.pdf]

## Genome-scale metabolic modelling of responses to polymyxins in *Pseudomonas aeruginosa* --Manuscript Draft--

|                                                      |                                                                                                                                                                                                                                                                                                                                                                                                                                                                                                                                                                                                                                                                                                                                                                                                                                                                                                                                                                                                                                                                                                                                                                                                                                                                                                                                                                                                                                                                                                                                                                                                                                                                                                                                                                                                                                                                                                                                                       |                     |
|------------------------------------------------------|-------------------------------------------------------------------------------------------------------------------------------------------------------------------------------------------------------------------------------------------------------------------------------------------------------------------------------------------------------------------------------------------------------------------------------------------------------------------------------------------------------------------------------------------------------------------------------------------------------------------------------------------------------------------------------------------------------------------------------------------------------------------------------------------------------------------------------------------------------------------------------------------------------------------------------------------------------------------------------------------------------------------------------------------------------------------------------------------------------------------------------------------------------------------------------------------------------------------------------------------------------------------------------------------------------------------------------------------------------------------------------------------------------------------------------------------------------------------------------------------------------------------------------------------------------------------------------------------------------------------------------------------------------------------------------------------------------------------------------------------------------------------------------------------------------------------------------------------------------------------------------------------------------------------------------------------------------|---------------------|
| <b>Manuscript Number:</b>                            | GIGA-D-17-00272                                                                                                                                                                                                                                                                                                                                                                                                                                                                                                                                                                                                                                                                                                                                                                                                                                                                                                                                                                                                                                                                                                                                                                                                                                                                                                                                                                                                                                                                                                                                                                                                                                                                                                                                                                                                                                                                                                                                       |                     |
| <b>Full Title:</b>                                   | Genome-scale metabolic modelling of responses to polymyxins in <i>Pseudomonas aeruginosa</i>                                                                                                                                                                                                                                                                                                                                                                                                                                                                                                                                                                                                                                                                                                                                                                                                                                                                                                                                                                                                                                                                                                                                                                                                                                                                                                                                                                                                                                                                                                                                                                                                                                                                                                                                                                                                                                                          |                     |
| <b>Article Type:</b>                                 | Research                                                                                                                                                                                                                                                                                                                                                                                                                                                                                                                                                                                                                                                                                                                                                                                                                                                                                                                                                                                                                                                                                                                                                                                                                                                                                                                                                                                                                                                                                                                                                                                                                                                                                                                                                                                                                                                                                                                                              |                     |
| <b>Funding Information:</b>                          | Monash University<br>(Major Interdisciplinary Research Grant)                                                                                                                                                                                                                                                                                                                                                                                                                                                                                                                                                                                                                                                                                                                                                                                                                                                                                                                                                                                                                                                                                                                                                                                                                                                                                                                                                                                                                                                                                                                                                                                                                                                                                                                                                                                                                                                                                         | Prof Jian Li        |
|                                                      | National Health and Medical Research Council<br>(APP1127948)                                                                                                                                                                                                                                                                                                                                                                                                                                                                                                                                                                                                                                                                                                                                                                                                                                                                                                                                                                                                                                                                                                                                                                                                                                                                                                                                                                                                                                                                                                                                                                                                                                                                                                                                                                                                                                                                                          | Prof Jian Li        |
|                                                      | National Institute of Allergy and Infectious Diseases<br>(R01 AI111965)                                                                                                                                                                                                                                                                                                                                                                                                                                                                                                                                                                                                                                                                                                                                                                                                                                                                                                                                                                                                                                                                                                                                                                                                                                                                                                                                                                                                                                                                                                                                                                                                                                                                                                                                                                                                                                                                               | Prof Jian Li        |
|                                                      | National Health and Medical Research Council<br>(APP1086825)                                                                                                                                                                                                                                                                                                                                                                                                                                                                                                                                                                                                                                                                                                                                                                                                                                                                                                                                                                                                                                                                                                                                                                                                                                                                                                                                                                                                                                                                                                                                                                                                                                                                                                                                                                                                                                                                                          | Dr Tony Velkov      |
|                                                      | National Health and Medical Research Council<br>(APP1063069)                                                                                                                                                                                                                                                                                                                                                                                                                                                                                                                                                                                                                                                                                                                                                                                                                                                                                                                                                                                                                                                                                                                                                                                                                                                                                                                                                                                                                                                                                                                                                                                                                                                                                                                                                                                                                                                                                          | Prof Jian Li        |
|                                                      | Australian Research Council<br>(FL130100038)                                                                                                                                                                                                                                                                                                                                                                                                                                                                                                                                                                                                                                                                                                                                                                                                                                                                                                                                                                                                                                                                                                                                                                                                                                                                                                                                                                                                                                                                                                                                                                                                                                                                                                                                                                                                                                                                                                          | Prof Trevor Lithgow |
| <b>Abstract:</b>                                     | <p>Background: <i>Pseudomonas aeruginosa</i> often causes multidrug-resistant infections in immunocompromised patients and polymyxins are often used as the last-line therapy. Alarming, resistance to polymyxins has been increasingly reported worldwide recently. To rescue this last-resort class of antibiotics, it is necessary to systematically understand how <i>P. aeruginosa</i> alters its metabolism in response to polymyxin treatment, thereby facilitating the development of effective antimicrobial therapies. To this end, genome-scale metabolic model (GSMM) was employed to analyse bacterial metabolic changes at the systems level.</p> <p>Findings: A high-quality GSMM iPAO1 was constructed for <i>P. aeruginosa</i> PAO1 for antimicrobial pharmacological research. Model iPAO1 encompasses an additional periplasmic compartment and contains 3,022 metabolites, 4,265 reactions and 1,458 genes in total. Growth prediction on 190 carbon and 95 nitrogen sources achieved an accuracy of 89.1%, outperforming all reported <i>P. aeruginosa</i> models. Notably, prediction of the essential genes for growth achieved a high accuracy of 87.9%. Metabolic simulation showed that lipid A modifications associated with polymyxin resistance exert a limited impact on bacterial growth and metabolism, but remarkably change the physiochemical properties of the outer membrane. Modelling with transcriptomics constraints revealed a broad range of metabolic responses to polymyxin treatment, including reduced biomass synthesis, upregulated amino acids catabolism, induced flux through the tricarboxylic acid cycle, and increased redox turnover.</p> <p>Conclusions: Overall, iPAO1 represents the most comprehensive GSMM constructed to date for a Gram-negative bacterium. It provides a powerful systems pharmacology platform for the elucidation of complex killing mechanisms of antibiotics.</p> |                     |
| <b>Corresponding Author:</b>                         | Jian Li<br><br>AUSTRALIA                                                                                                                                                                                                                                                                                                                                                                                                                                                                                                                                                                                                                                                                                                                                                                                                                                                                                                                                                                                                                                                                                                                                                                                                                                                                                                                                                                                                                                                                                                                                                                                                                                                                                                                                                                                                                                                                                                                              |                     |
| <b>Corresponding Author Secondary Information:</b>   |                                                                                                                                                                                                                                                                                                                                                                                                                                                                                                                                                                                                                                                                                                                                                                                                                                                                                                                                                                                                                                                                                                                                                                                                                                                                                                                                                                                                                                                                                                                                                                                                                                                                                                                                                                                                                                                                                                                                                       |                     |
| <b>Corresponding Author's Institution:</b>           |                                                                                                                                                                                                                                                                                                                                                                                                                                                                                                                                                                                                                                                                                                                                                                                                                                                                                                                                                                                                                                                                                                                                                                                                                                                                                                                                                                                                                                                                                                                                                                                                                                                                                                                                                                                                                                                                                                                                                       |                     |
| <b>Corresponding Author's Secondary Institution:</b> |                                                                                                                                                                                                                                                                                                                                                                                                                                                                                                                                                                                                                                                                                                                                                                                                                                                                                                                                                                                                                                                                                                                                                                                                                                                                                                                                                                                                                                                                                                                                                                                                                                                                                                                                                                                                                                                                                                                                                       |                     |
| <b>First Author:</b>                                 | Yan Zhu                                                                                                                                                                                                                                                                                                                                                                                                                                                                                                                                                                                                                                                                                                                                                                                                                                                                                                                                                                                                                                                                                                                                                                                                                                                                                                                                                                                                                                                                                                                                                                                                                                                                                                                                                                                                                                                                                                                                               |                     |

|                                                                                                                                                                                                                                                                                                                                                                         |                                                                                                                                  |
|-------------------------------------------------------------------------------------------------------------------------------------------------------------------------------------------------------------------------------------------------------------------------------------------------------------------------------------------------------------------------|----------------------------------------------------------------------------------------------------------------------------------|
| <b>First Author Secondary Information:</b>                                                                                                                                                                                                                                                                                                                              |                                                                                                                                  |
| <b>Order of Authors:</b>                                                                                                                                                                                                                                                                                                                                                | Yan Zhu                                                                                                                          |
|                                                                                                                                                                                                                                                                                                                                                                         | Tobias Czauderna                                                                                                                 |
|                                                                                                                                                                                                                                                                                                                                                                         | Jinxin Zhao                                                                                                                      |
|                                                                                                                                                                                                                                                                                                                                                                         | Matthias Klapperstueck                                                                                                           |
|                                                                                                                                                                                                                                                                                                                                                                         | Mohd Hafidz Mahamad Maifiah                                                                                                      |
|                                                                                                                                                                                                                                                                                                                                                                         | Mei-Ling Han                                                                                                                     |
|                                                                                                                                                                                                                                                                                                                                                                         | Jing Lu                                                                                                                          |
|                                                                                                                                                                                                                                                                                                                                                                         | Björn Sommer                                                                                                                     |
|                                                                                                                                                                                                                                                                                                                                                                         | Tony Velkov                                                                                                                      |
|                                                                                                                                                                                                                                                                                                                                                                         | Trevor Lithgow                                                                                                                   |
|                                                                                                                                                                                                                                                                                                                                                                         | Jiangning Song                                                                                                                   |
|                                                                                                                                                                                                                                                                                                                                                                         | Falk Schreiber                                                                                                                   |
|                                                                                                                                                                                                                                                                                                                                                                         | Jian Li                                                                                                                          |
| <b>Order of Authors Secondary Information:</b>                                                                                                                                                                                                                                                                                                                          |                                                                                                                                  |
| <b>Opposed Reviewers:</b>                                                                                                                                                                                                                                                                                                                                               | Jason Papin, Ph.D.<br>Professor of Biomedical Engineering, University of Virginia<br>papin@virginia.edu<br>Conflicts of research |
| <b>Additional Information:</b>                                                                                                                                                                                                                                                                                                                                          |                                                                                                                                  |
| <b>Question</b>                                                                                                                                                                                                                                                                                                                                                         | <b>Response</b>                                                                                                                  |
| Are you submitting this manuscript to a special series or article collection?                                                                                                                                                                                                                                                                                           | No                                                                                                                               |
| <b>Experimental design and statistics</b>                                                                                                                                                                                                                                                                                                                               | Yes                                                                                                                              |
| Full details of the experimental design and statistical methods used should be given in the Methods section, as detailed in our <a href="#">Minimum Standards Reporting Checklist</a> . Information essential to interpreting the data presented should be made available in the figure legends.                                                                        |                                                                                                                                  |
| Have you included all the information requested in your manuscript?                                                                                                                                                                                                                                                                                                     |                                                                                                                                  |
| <b>Resources</b>                                                                                                                                                                                                                                                                                                                                                        | Yes                                                                                                                              |
| A description of all resources used, including antibodies, cell lines, animals and software tools, with enough information to allow them to be uniquely identified, should be included in the Methods section. Authors are strongly encouraged to cite <a href="#">Research Resource Identifiers</a> (RRIDs) for antibodies, model organisms and tools, where possible. |                                                                                                                                  |

|                                                                                                                                                                                                                                                                                                                                                                                                                                                                                                                                                         |            |
|---------------------------------------------------------------------------------------------------------------------------------------------------------------------------------------------------------------------------------------------------------------------------------------------------------------------------------------------------------------------------------------------------------------------------------------------------------------------------------------------------------------------------------------------------------|------------|
| <p>Have you included the information requested as detailed in our <a href="#">Minimum Standards Reporting Checklist</a>?</p>                                                                                                                                                                                                                                                                                                                                                                                                                            |            |
| <p><b>Availability of data and materials</b></p> <p>All datasets and code on which the conclusions of the paper rely must be either included in your submission or deposited in <a href="#">publicly available repositories</a> (where available and ethically appropriate), referencing such data using a unique identifier in the references and in the “Availability of Data and Materials” section of your manuscript.</p> <p>Have you have met the above requirement as detailed in our <a href="#">Minimum Standards Reporting Checklist</a>?</p> | <p>Yes</p> |

1 **Genome-scale metabolic modelling of responses to polymyxins in *Pseudomonas***  
2 ***aeruginosa***

3 Yan Zhu<sup>1</sup>, Tobias Czauderna<sup>2</sup>, Jinxin Zhao<sup>1</sup>, Matthias Klapperstueck<sup>2</sup>, Mohd Hafidz

4 Mahamad Maifiah<sup>3</sup>, Mei-Ling Han<sup>3</sup>, Jing Lu<sup>4</sup>, Björn Sommer<sup>5</sup>, Tony Velkov<sup>6</sup>, Trevor

5 Lithgow<sup>1</sup>, Jiangning Song<sup>1</sup>, Falk Schreiber<sup>2,5\*</sup>, Jian Li<sup>1\*,+</sup>

6 <sup>1</sup> Monash Biomedicine Discovery Institute, Department of Microbiology, Faculty of Medicine,  
7 Nursing and Health Sciences, Monash University, Melbourne 3800, Australia; <sup>2</sup> Faculty of  
8 Information Technology, Monash University, Melbourne 3800, Australia; <sup>3</sup> Faculty of  
9 Pharmacy and Pharmaceutical Sciences, Monash University, Melbourne 3052, Australia; <sup>4</sup>  
10 Monash Institute of Cognitive and Clinical Neurosciences, Department of Anatomy and  
11 development biology, Faculty of Medicine, Nursing and Health Sciences, Monash University,  
12 Melbourne 3800, Australia; <sup>5</sup> Department of Computer and Information Science, University of  
13 Konstanz, Konstanz 78457, Germany; <sup>6</sup> Department of Pharmacology and Therapeutics,  
14 University of Melbourne, Melbourne 3010, Australia.

15 **Email addresses:** YZ, yan.zhu@monash.edu; TC, tobias.czauderna@monash.edu; JZ,  
16 jinxin.zhao@monash.edu; MK, matthias.klapperstueck@monash.edu; MHMM,  
17 hafidz.maifiah@monash.edu; MLH, meiling.han@monash.edu; JLU, jing.lu2@monash.edu;  
18 BS, bjoern.sommer@uni-konstanz.de; TV, tony.velkov@unimelb.edu.au; TL,  
19 trevor.lithgow@monash.edu; JS, jiangning.song@monash.edu; FS, falk.schreiber@uni-  
20 konstanz.de; JL, jian.li@monash.edu.

21 **Running title:** Metabolic modelling polymyxins responses

22 \*Joint Senior authors. <sup>+</sup>Corresponding author. 19 Innovation Walk, Monash University, VIC  
23 3800, Australia. Tel: +61 3 9903 9702, Fax: +61 3 9902 9222, Email: [jian.li@monash.edu](mailto:jian.li@monash.edu).

24 Part of this work was presented at the 27<sup>th</sup> European Congress of Clinical Microbiology and  
25 Infectious Diseases, 22-25 April 2017, Vienna, Austria.

26 **Abstract**

27 **Background:** *Pseudomonas aeruginosa* often causes multidrug-resistant infections in  
28 immunocompromised patients and polymyxins are often used as the last-line therapy.  
29 Alarming, resistance to polymyxins has been increasingly reported worldwide recently. To  
30 rescue this last-resort class of antibiotics, it is necessary to systematically understand how *P.*  
31 *aeruginosa* alters its metabolism in response to polymyxin treatment, thereby facilitating the  
32 development of effective therapies. To this end, genome-scale metabolic model (GSMM) was  
33 employed to analyse bacterial metabolic changes at the systems level.

34 **Findings:** A high-quality GSMM *iPAO1* was constructed for *P. aeruginosa* PAO1 for  
35 antimicrobial pharmacological research. Model *iPAO1* encompasses an additional periplasmic  
36 compartment and contains 3,022 metabolites, 4,265 reactions and 1,458 genes in total. Growth  
37 prediction on 190 carbon and 95 nitrogen sources achieved an accuracy of 89.1%,  
38 outperforming all reported *P. aeruginosa* models. Notably, prediction of the essential genes for  
39 growth achieved a high accuracy of 87.9%. Metabolic simulation showed that lipid A  
40 modifications associated with polymyxin resistance exert a limited impact on bacterial growth  
41 and metabolism, but remarkably change the physiochemical properties of the outer membrane.  
42 Modelling with transcriptomics constraints revealed a broad range of metabolic responses to  
43 polymyxin treatment, including reduced biomass synthesis, upregulated amino acids  
44 catabolism, induced flux through the tricarboxylic acid cycle, and increased redox turnover.

45 **Conclusions:** Overall, *iPAO1* represents the most comprehensive GSMM constructed to date  
46 for a Gram-negative bacterium. It provides a powerful systems pharmacology platform for the  
47 elucidation of complex killing mechanisms of antibiotics.

48 **Keywords:** Genome-scale metabolic model; *Pseudomonas aeruginosa*; polymyxin; lipid A  
49 modification; outer membrane

## 50 Background

1  
2  
3 51 *Pseudomonas aeruginosa* is a common multidrug-resistant (MDR) pathogen in immune-  
4  
5 52 compromised patients, cystic fibrosis patients and burns victims [1-6]. It possesses a large  
6  
7 53 genome (5.5-7.0 Mb), complex regulatory networks, remarkable metabolic versatility and an  
8  
9 54 extraordinary ability to survive extremely harsh conditions such as prolonged antibiotic  
10  
11 55 exposure [7, 8]. Polymyxins (i.e. polymyxin B and colistin) have been increasingly used as a  
12  
13 56 last-line therapy to treat infections caused by MDR *P. aeruginosa* [9]. Alarminglly, the  
14  
15 57 prevalence of polymyxin resistance in *P. aeruginosa* has increased worldwide over the past  
16  
17 58 few years [3, 10, 11].  
18  
19  
20  
21

22  
23 59 The exact mode of action of polymyxins is not clear except the initial electrostatic and  
24  
25 60 hydrophobic interactions with lipid A, a component of the lipopolysaccharide (LPS) in the  
26  
27 61 bacterial outer membrane (OM). Subsequently, cell envelope is disorganised, cellular contents  
28  
29 62 leak, oxidative stress increases, and finally cell death occurs [2, 9, 12, 13]. After polymyxin  
30  
31 63 treatment, *P. aeruginosa* modifies its lipid A structure to attenuate the aforementioned  
32  
33 64 electrostatic interactions [14]. Our recent metabolomics data demonstrated that, apart from  
34  
35 65 lipid A modifications, numerous biochemical pathways are perturbed by polymyxin treatment,  
36  
37 66 indicating that the development of polymyxin resistance by *P. aeruginosa* involves a  
38  
39 67 complicated interplay of multiple cellular processes [15]. There are significant gaps in the  
40  
41 68 knowledge-base of the mechanisms of polymyxin activity and bacterial responses in *P.*  
42  
43 69 *aeruginosa*, thereby necessitating comprehensive investigations using systems pharmacology  
44  
45 70 approaches.  
46  
47  
48  
49

50  
51  
52 71 With the rapid development of genome-scale metabolic models (GSMMs) and the associated  
53  
54 72 flux balance analysis (FBA) methods, systematic investigations into the metabolic changes in  
55  
56 73 response to external nutrient alterations, genetic perturbations, and antibiotic treatments are  
57  
58 74 now becoming feasible [16-24]. Four GSMMs have been constructed for *P. aeruginosa* and  
59  
60  
61  
62  
63  
64  
65

1  
2  
3  
4  
5  
6  
7  
8  
9  
10  
11  
12  
13  
14  
15  
16  
17  
18  
19  
20  
21  
22  
23  
24  
25  
26  
27  
28  
29  
30  
31  
32  
33  
34  
35  
36  
37  
38  
39  
40  
41  
42  
43  
44  
45  
46  
47  
48  
49  
50  
51  
52  
53  
54  
55  
56  
57  
58  
59  
60  
61  
62  
63  
64  
65

75 they are iMO1056 [25], Opt208964 [26] , iMO1086 [27] and the latest iPae1146 [28]; among  
76 which iMO1056 and Opt208964 share the same identifier systems and are fully accessible via  
77 Model SEED [29]. The previous applications of these models have included simulating the  
78 metabolic dynamics in cystic fibrosis patients [30], elucidating the mechanisms of biofilm  
79 formation [31, 32], predicting potential drug targets [33-35] and identifying the key genes  
80 controlling virulence factors [28]. As important as they have been, these models have several  
81 overarching limitations. Those past models (i) do not include a major cellular component, the  
82 periplasmic space; (ii) have poor representation of glycerophospholipid (GPL) biosynthesis;  
83 and (iii) lack lipid A modification reactions. Considering the pathogenesis of *P. aeruginosa*,  
84 these major limitations significantly compromise the modelling functions. In particularly, the  
85 power of the four reported GSMMs to predict metabolic responses to antibiotic treatment is  
86 very limited, as periplasmic GPL and LPS biogenesis play critical roles in responses to anti-  
87 pseudomonal antibiotics such as polymyxins [15, 36-39].

88 Here we describe *iPAO1*, a newly developed GSMM for *P. aeruginosa* PAO1 based upon  
89 Opt208964 [26] and iMO1056 [25] but with intensive manual curation using several major  
90 databases and the literature. Most notably, *iPAO1* is the first GSMM for *P. aeruginosa* where  
91 the periplasmic space compartment is incorporated to comprehensively represent cross-  
92 membrane transport, GPL metabolism and LPS biosynthesis. To the best of our knowledge  
93 *iPAO1* represents the most comprehensive metabolic reconstruction for *P. aeruginosa* PAO1  
94 and the largest manually curated metabolic model for any Gram-negative bacterium thus far.  
95 Modelling with *iPAO1* revealed that the lipid A modifications might exert limited impact on  
96 cell growth and metabolism but change the physiochemical properties of bacterial OM.  
97 Constrained by gene expression levels, the model was employed to elucidate the metabolic  
98 responses to polymyxin B treatment. Together, *iPAO1* provides a powerful systems platform  
99 for antimicrobial pharmacological research to combat the rapidly increasing resistance.

100

1  
2  
3  
4  
5  
6  
7  
8  
9  
10  
11  
12  
13  
14  
15  
16  
17  
18  
19  
20  
21  
22  
23  
24  
25  
26  
27  
28  
29  
30  
31  
32  
33  
34  
35  
36  
37  
38  
39  
40  
41  
42  
43  
44  
45  
46  
47  
48  
49  
50  
51  
52  
53  
54  
55  
56  
57  
58  
59  
60  
61  
62  
63  
64  
65

## 101 **Data Description**

102 The genome sequence and annotation of *P. aeruginosa* PAO1 were obtained from GenBank  
103 (Accession NC\_002516.2). Models iMO1056 and Opt208964 were retrieved from Model  
104 SEED [29]. The gas chromatography–mass spectrometry (GC-MS) metabolomics data were  
105 collected from the literature [40]. Metabolites, reactions and pathways were obtained from  
106 biochemical databases KEGG (Kyoto Encyclopaedia of Genes and Genomes) [41], MetaCyc  
107 [42], TCBD (Transporter Classification Database) [43], TransporterDB [44] and Pseudomonas  
108 Genome DB [45]. Growth phenotypes on 190 carbon sources and 95 nitrogen sources were  
109 determined using BIOLOG Phenotypic Microarrays. Non-essential gene lists were collected  
110 from two previously reported transposon mutant libraries for PAO1 [46, 47]. Lipid A of wild-  
111 type *P. aeruginosa* PAK and its polymyxin-resistant mutant PAK $\text{pmrB6}$  was extracted using  
112 mild acid hydrolysis method and the structural analysis of lipid A was conducted using mass  
113 spectrometry [39]. RNA was extracted and employed to construct cDNA libraries for RNA-  
114 Seq on Illumina MiSeq platform [48]. The raw reads were quality trimmed and aligned to  
115 PAO1 reference genome using SubRead [49]. Counts were normalised and the differential gene  
116 expression was determined using voom/limma packages with Degust [50]. Whole-cell lipids  
117 and intracellular metabolites were extracted using the single-phase Blich-Dyer method as  
118 previously described and analysed by liquid chromatography-mass spectrometry (LC-MS) [14,  
119 39]. Raw metabolomics data were processed with IDEOM software followed by bioinformatic  
120 analysis [51].

121

## 122 **Analyses**

### 123 **Development of a superior GSMM for *P. aeruginosa* PAO1**



124 Initially, a draft model (*i*PAO1\_draft1) containing 1,991 reactions, 1,579 metabolites and 1,021  
125 genes was created based upon iMO1056 [25] and Opt208964 [26] (**Additional files 2-4**). To  
126 obtain a high-quality GSMM, extensive manual curation was conducted. Firstly, *i*PAO1\_draft1  
127 was complemented using databases and the literature. Specifically, the following additional  
128 information was incorporated into the draft model, 285 metabolites and 36 reactions from  
129 KEGG [41], 225 metabolites and 50 reactions from MetaCyc [42], and 7 metabolites and 20  
130 reactions obtained by previous GC-MS-based quantification [40] (**Additional files 5 and 6**).

131 Secondly, a periplasmic compartment was built to incorporate 698 periplasmic metabolites,  
132 509 transport reactions across the inner membrane (IM), 441 transport reactions across the  
133 outer membrane (OM), and 403 periplasmic reactions. The resulting intermediate model was  
134 designated as *i*PAO1\_draft2.

135 Thirdly, the major pathway gaps were filled. GapFind [52] identified 109 dead-end metabolites  
136 (**Additional file 7**). The growth phenotypes on 190 carbon and 95 nitrogen nutrients were  
137 predicted using *i*PAO1\_draft2, and compared with our experimental BIOLOG Phenotypic  
138 Microarray (PM) results (**Additional file 8**). As a result, 162 false negative predictions (i.e. the  
139 prediction indicated non-growth whereas the BIOLOG experiment demonstrated valid growth  
140 on a specific nutrient) were determined, indicating the lack of associated transport or catabolic  
141 reactions for these nutrients. To link the dead-end metabolites back to the metabolic network  
142 and eliminate inconsistencies with the BIOLOG PM results, several modifications were made  
143 including (i) adjustment of the reversibility settings of 180 reactions and changing the  
144 directions of 87 reactions (**Additional file 9**); (ii) removal of 14 metabolites and 96 reactions  
145 (**Additional files 10 and 11**), which were either duplicated (e.g.  $\beta$ -D-glucose was duplicated  
146 with D-glucose) or representing general metabolite classes (e.g. protein, mRNA, DNA); and  
147 (iii) addition of 98 boundary reactions, 677 transport reactions, and 252 metabolic reactions  
148 (**Additional file 12**). Resolving the false negative predictions of the BIOLOG growth

149 phenotypes substantially improved the model. For example, predictions using *iPAO1\_draft2*  
150 showed that PAO1 was unable to grow with formic acid as a sole carbon source due to the lack  
151 of the corresponding transport reaction. Interrogating the Pseudomonas Genome Database [45]  
152 and Pfam [53] identified PA2777, a hypothetical protein in NCBI and UniProt which may  
153 encode formic/nitrite transporter (Pfam01226,  $P=7e-34$ ). Subsequent addition of the transport  
154 reaction (rxn08526) enabled *in silico* growth of PAO1 on formic acid. Another example is that  
155 initially *iPAO1\_draft2* failed to predict utilisation of 1,2-propanediol for growth owing to the  
156 exiting gap in dehydrogenation of 1,2-propanediol to lactaldehyde. Using BLASTp with the  
157 query sequence of lactaldehyde reductase (*fucO*, *b2799*) from *Escherichia coli* K12 MG1655  
158 identified a candidate homologous gene PA1991 (Identity=35%, Eval=2e-75, BLASTp).  
159 PA1991 encodes an iron-containing alcohol dehydrogenase and has over 300 orthologues in  
160 Gram-negative bacteria which encode lactaldehyde oxidoreductases or 1,2-propanediol  
161 dehydrogenases according to OrthoDB [54]. Inactivation of PA1991 resulted in 8-fold  
162 prolonged lag phase when *P. aeruginosa* grew on 1,2-propanediol [55]. Therefore, reaction  
163 rxn01615 oxidising 1,2-propanediol to lactaldehyde was added into *iPAO1\_draft2*. A very  
164 large number of such labour intensive manual curations were conducted to improve the model.  
165 This enabled *in silico* growth on a number of nutrients from BIOLOG PM, including 4-  
166 hydroxyphenylacetate, tyramine, quinic acid, itaconic acid, citramalic acid, L-pyroglutamic  
167 acid, carnidine, glycinebetaine, L-methylsuccinate, and D-amino acids (**Additional file 8**).

168 Fourthly, the biogenesis of bacterial envelope was delineated. Cross-linking between amino  
169 acids residues among peptidoglycan chains results in a rigid network structure in *P. aeruginosa*  
170 [56]. In total, 17 reactions representing peptidoglycan cross-linking and hydrolysis were  
171 incorporated by searching for homologues of glycosyltransferases, transpeptidases,  
172 carboxypeptidases and endopeptidases in PAO1 [57]. Overall, a detailed peptidoglycan  
173 biosynthesis pathway was constructed with 60 reactions. GPL compositions in the bacterial

174 membranes can change in response to antibiotic treatment [36, 58]. Previous studies [59] and  
175 our own lipidomics results [14] showed a great diversity in GPL species in *P. aeruginosa*.  
176 Overall, 386 unique metabolites (i.e. 66.2% of the 583 metabolites in the GPL metabolism  
177 pathway) and 367 reactions (66.7% of the 550 reactions in the GPL metabolism pathway) were  
178 incorporated into *iPAO1\_draft2* (**Additional files 1, 13 and 14, Fig 1**). LPS consists of lipid  
179 A, core oligosaccharide, and *O*-antigen polysaccharide [37], and plays key roles in the host-  
180 pathogen interaction and the resistance to antibiotics such as polymyxins [13, 60]. A detailed  
181 synthesis and interconversion network was generated with 432 types of LPS and 1,169  
182 reactions (**Fig 2, Additional file 1**). Notably, our GSMM is the most comprehensive to date in  
183 lipid A biosynthesis and modifications.

184 The resulting final *iPAO1* model consisted of 3,022 metabolites, 4,365 reactions and 1,458  
185 genes (25.8% of the PAO1 genome, **Additional files 15-17**), representing, respectively, (i)  
186 252%, 340% and 40% increase of the components in *iMO1056*; and (ii) 125%, 171% and 43%  
187 increase of the components in *Opt208964* (**Table 1**). The significant expansion in *iPAO1*  
188 includes cross-membrane transport, GPL/LPS biosynthesis, peptidoglycan biosynthesis, and  
189 fatty acid degradation (**Additional files 15-17**). The reactions from *iPAO1* were categorised  
190 into 109 pathways mainly based on classifications in MetaCyc and KEGG. In *iPAO1*,  
191 27.9%/43.7%/51.6% metabolites, 20.3%/33.5%/59.5% reactions and 65.3%/17.6%/28.5%  
192 genes are originated from *iMO1056*, *Opt208964*, and our manual curation, respectively (**Fig**  
193 **3A**).

194 Components in *iPAO1* were aligned with databases including KEGG [41], MetaCyc [42],  
195 PubChem [61], ChemSpider [62], ChEBI [63], Model SEED [29], and BiGG [64] (**Additional**  
196 **files 15 and 16**). Consequently, 1,404 (46.5%), 1,590 (52.6%) and 2,142 (70.9%) metabolites  
197 have corresponding identifiers in MetaCyc, KEGG and Model SEED, respectively; 1,556  
198 (35.6%), 1,596 (36.6%) and 1,964 (45.0%) reactions were computationally mapped to the

199 reactions from MetaCyc, KEGG and Model SEED, accordingly (**Fig 3B**). A significant portion  
200 of mismatches were caused by the incorporation of specific types of metabolites in the GPL  
201 metabolism and LPS biosynthesis pathway, which in databases are usually lumped as general  
202 compound classes. The properties of metabolites, including mass, charge and formula were  
203 included in *iPAO1*. The standard Gibbs free energy change of formation ( $\Delta_f G^\circ$ ), and reaction  
204 ( $\Delta_r G^\circ$ ) were obtained from MetaCyc and Model SEED for 1,877 metabolites (62.1%) and 1,355  
205 reactions (31.0%) (**Additional files 15 and 16**).

206 A breakdown of genes involved in *iPAO1* (**Additional file 17**) using the clusters of orthologous  
207 groups (COGs) showed remarkable improvement compared to previous reconstructions (**Fig**  
208 **3C**). The largest increase in the coverage compared to *iMO1056* is lipid transport and  
209 metabolism (24.1%), followed by inorganic ion transport and metabolism (19.3%); whereas  
210 compared to *Opt208964*, the largest increase in the coverage is nucleotide transport and  
211 metabolism (57.9%), followed by amino acid transport and metabolism (52.0%). Overall, the  
212 transport and metabolism of nucleotides and amino acids showed the highest percent coverage  
213 of COG functional categories in *iPAO1* (72.9% and 65.6%, respectively). Notably, the  
214 reactions in categories not apparently related to metabolism were dramatically reduced in  
215 *iPAO1* compared to *Opt208964*, including translation, ribosomal structure and biogenesis,  
216 posttranslational modification, protein turnover, chaperones and signal transduction  
217 mechanisms, or undetermined categories including function unknown class. Therefore, *iPAO1*  
218 is a well-defined, metabolism-dedicated model.

219 In the new *iPAO1* model, the pathways GPL metabolism, LPS biosynthesis and transport  
220 across OM were ranked the three largest pathways and also contained the highest proportion  
221 of curated reactions (**Fig 3D**). Additionally, these three pathways have high reaction-to-gene  
222 ratios (13.1-24.2, **Fig 3E**), indicating that enzymes in these pathways are capable of acting on  
223 a broad range of substrates. As kinetic parameters are usually not involved in a GSMM,

224 constraint-based analyses (e.g. FBA) of a GSMM do not directly account for enzyme levels,  
225 intracellular metabolic concentrations or substrate-level regulation. Accordingly, the affinity  
226 difference of various substrates was not considered in our *iPAO1* modelling effort.

227 We employed the biomass formation equation from iMO1056 to construct *iPAO1* with  
228 modifications on LPS and ion species (**Additional file 18**). In addition, to take into account the  
229 extra energy consumption caused by charging tRNAs, the original amino acids in the biomass  
230 formation reaction were replaced by aminoacyl-tRNA, followed by addition of specific  
231 charging reactions to the model. Taken together, *iPAO1* represents the most comprehensive  
232 metabolic reconstruction thus far for *P. aeruginosa* PAO1.

### 233 **Growth capability on various nutrients**

234 Investigation of nutrient utilisation using BIOLOG PM showed PAO1 could utilise a broad  
235 range of nutrient sources, indicated by the observed growth on 68 of 190 (35.8%) carbon and  
236 76 of 95 (80.0%) nitrogen substrates (**Fig 4**). Growth simulation with *iPAO1* achieved an  
237 overall accuracy of 89.1% (254 of 285), which substantially outperformed previous models  
238 (81.5% for Opt208964 [26], 77.9% for iMO1056 and iMO1086 [27] and 80% for iPae1146  
239 [28]. Twenty-one false-positive and 10 false-negative (**Fig 4, Additional file 8**) disagreements  
240 were observed, possibly due to the complexity of regulatory mechanisms and missing  
241 annotation of nutrient transport and/or catabolism pathways in PAO1.

### 242 **Prediction and validation of gene essentiality**

243 *In silico* single-gene deletion with *iPAO1* showed 143 essential genes ( $\mu_{mut} < 0.01 \mu_{wt}$ ), 40 semi-  
244 essential genes ( $0.01 \mu_{wt} < \mu_{mut} < 0.99 \mu_{wt}$ ), and 1,275 non-essential genes ( $0.99 \mu_{wt} < \mu_{mut} < \mu_{wt}$ )  
245 when growing in Luria-Bertani (LB) media (**Additional file 19**). Among the essential  
246 metabolic genes, the largest COG proportion (46 of 143, 32.1%) is cell envelope biogenesis,  
247 indicating that there are relatively less alternative reactions in this pathway. For non-essential

248 genes, amino acid transport and metabolism (352 of 1,315, 26.7%) represents the largest group,  
249 suggesting the existence of large metabolic redundancy.

250 The predicted gene essentiality was further verified by two independent genome-scale  
251 transposon mutant libraries [46, 47, 65]. The overall prediction accuracy achieved 87.9%,  
252 which is higher than iMO1056 (85.0%) [25] and iMO1086 (84.2%) [27], but slightly lower  
253 than Opt208964 (92.9%) [26] and iPae1146 (91.46%) [28]; this is possibly due to the  
254 incorporation of new genes (30.5% increase compared to Opt208964; 27.2% increase  
255 compared to iPae1146) whose metabolic functions were previously misannotated.

## 256 **Impact of lipid A modifications on bacterial growth and metabolism**

257 *P. aeruginosa* modifies lipid A components in the OM in response to polymyxin treatment [66].  
258 The LPS stoichiometric coefficients in the biomass formula of *iPAO1* were configured based  
259 on our lipidomics data (**Table 2**, [14]), to predict the metabolic impact of lipid A modifications  
260 (see Methods Section for details). Overall, 273 fluxes were significantly affected (Z-Score,  
261 false discovery rate (FDR)  $<0.01$ ;  $>0.1$  mmol·gDW·h<sup>-1</sup> under at least one condition, **Additional**  
262 **file 20**). The specific growth rate remained unchanged. A 0.026 mmol·gDW·h<sup>-1</sup> flux from  
263 glucose via glucose 6-phosphate, uridine diphosphate glucose, and consequently 4-amino-4-  
264 deoxy-L-arabinose (L-Ara4N) biosynthesis was identified due to lipid A modifications. The  
265 overall fluxes through lipid A deacylation reactions were increased (from 0.007 mmol·gDW·h<sup>-1</sup>  
266 <sup>1</sup> to 0.011 mmol·gDW·h<sup>-1</sup>); the generated (*R*)-3-hydroxydecanoate was fuelled into  $\beta$ -oxidation  
267 to produce octanoyl-CoA, which was subsequently salvaged for fatty acid biosynthesis.

268 To further investigate the impact of lipid A modifications on bacterial growth, 1,000 sets of the  
269 compositions of 288 heterogeneous LPS molecules were randomly generated with the total  
270 proportion of LPS unchanged in the biomass formation formula (**Additional file 21**). The  
271 metabolic fluxes were calculated for each of the 1,000 sets of LPS compositions using FBA.

272 Across the 1,000 sets of metabolic fluxes (**Additional file 23**), the specific growth rate varied  
273 between 0.8812 and 0.8897 mmol·gDW·h<sup>-1</sup>. Correlative analysis of the apparent overall  
274 physiochemical properties of lipid A (**Additional file 22**) with the predicted growth phenotypes  
275 showed three interesting findings. Firstly, addition of L-Ara4N reduced the negative charge of  
276 lipid A ( $\rho=1.00$ ), decreased the hydrophobicity of the OM (represented by logP,  $\rho=-0.59$ ), but  
277 required assimilation of more ammonia (represented by ammonia turnover,  $\rho=0.57$ ). Secondly,  
278 hydroxylation on acyl chains of lipid A exerted minor effects over either bacterial growth or  
279 physiochemical properties. Thirdly, addition of acyl chains resulted in large lipid A molecules  
280 (represented by the atomic counts,  $\rho=0.88$ ), enhanced molecular polarity of lipid A ( $\rho=0.87$ ),  
281 increased OM hydrophobicity ( $\rho=0.75$ ), and notably, retarded growth ( $\rho=-0.95$ ), reduced redox  
282 and energy turnover ( $\rho=-0.98$  for both), and increased requirement of ammonia ( $\rho=0.59$ ) (**Fig**  
283 **5**). It is evident that none of the three aforementioned modifications produced a dramatic impact  
284 on bacterial growth or metabolism (**Additional file 23**).

### 285 **Elucidating the mechanisms of metabolic responses to polymyxin treatment**

286 RNA-Seq data were utilised as model constraints (**Additional file 24**) to calculate the  
287 metabolic fluxes in the absence and presence of polymyxin B (*cf.* Methods). Comparison of  
288 the flux distributions revealed that 1,392 reactions were differentially regulated (FDR<0.01,  
289 **Additional file 25**). A range of metabolic pathways were significantly disturbed, including  
290 central metabolism, amino acid metabolism, purine biosynthesis, fatty acid biosynthesis and  
291 metabolism, LPS and GPL biosynthesis and transport reactions. Polymyxin B treatment  
292 reduced the growth rate (18.2%), increased oxygen uptake (6.9%) and CO<sub>2</sub> emission (6.0%);  
293 however, the respiration quotient remained roughly unchanged (**Table 3**).

294 As the major carbon sources, the amino acids and oligopeptides from cation-adjusted Mueller-  
295 Hinton broth (CAMHB) were utilised to generate intermediate metabolites, redox and energy

296 equivalents for biomass formation. In response to polymyxin treatment, the gluconeogenesis  
297 pathway was significantly induced from pyruvate to 3-phosphoglycerate, but suppressed from  
298 3-phosphoglycerate towards glucose 6-phosphate. The extra flux from 3-phosphoglycerate was  
299 shunt to serine and glycine biosynthesis (**Fig 6**) via 3-phospho-D-glycerate:NAD<sup>+</sup>  
300 oxidoreductase (rxn01101), 3-phosphoserine:2-oxoglutarate aminotransferase (rxn02914), *O*-  
301 phospho-L-serine phosphohydrolase (rxn00420), and 5,10-methylenetetrahydrofolate:glycine  
302 hydroxymethyltransferase (rxn00692), through which more NADH equivalent was generated  
303 compared to the control. The resulting one-carbon unit in 5,10-methylenetetrahydrofolate was  
304 oxidised to formic acid via 10-formyltetrahydrofolate amidohydrolase (rxn00691); the  
305 generated glycine was fuelled into TCA cycle via glycine:oxygen oxidoreductase (rxn00269)  
306 and acetyl-CoA:glyoxylate C-acetyltransferase (rxn00330). In addition, the metabolic flux via  
307 TCA cycle was upregulated from citrate to fumarate, with increased NADH production. Within  
308 oxidative phosphorylation, the mean fluxes through NADH dehydrogenase (Complex I,  
309 rxn10122), cytochrome bc1 complex (Complex III, rxn13820), and cytochrome c oxidase  
310 (Complex IV, rxn13688) decreased by 6.6%, 7.2% and 7.8%, respectively. The flux via F<sub>0</sub>F<sub>1</sub>-  
311 ATPase (Complex V, rxn10042) was downregulated by 11.1%. The overall fluxes via  
312 biosynthesis of macromolecules including LPS, GPL and peptidoglycan decreased due to the  
313 significantly reduced biomass formation. The biosynthesis of spermidine increased by 38.3%  
314 in response to polymyxin treatment which was also indicated by upregulated expression of  
315 *speD* (PA4773; encoding the *S*-adenosyl-L-methionine decarboxylase, log<sub>2</sub>FC=3.62,  
316 FDR<0.01) and *speE* (PA4774; encoding spermidine synthase, log<sub>2</sub>FC = 3.54, FDR<0.01).

317 Calculating the flux-sum of critical cofactors revealed 13.1% increase of redox turnover and  
318 8.2% decline of energy turnover after 1 mg/L polymyxin B treatment for 1 h. Breaking down  
319 the cofactors showed the turnover of major redox equivalents NADH, NADPH, ubiquinol-8  
320 and FADH<sub>2</sub> substantially increased by 12.6%, 13.9%, 3.9% and 35.9%, respectively; whereas



1 321 the turnover of ATP, the major contributor to energy significantly decreased by 8.52% after 1  
2 322 mg/L polymyxin treatment for 1 h (**Fig 6, Additional file 26**). Overall, metabolic flux analysis  
3  
4 323 using *iPAO1* integrated with our transcriptomics data revealed a significant global impact on  
5  
6  
7 324 bacterial metabolism due to polymyxin B treatment.  
8  
9

10 325

## 11 12 13 326 **Discussion**

14  
15  
16 327 The emergence of Gram-negative ‘superbugs’ that are resistant to the last-resort polymyxins  
17  
18 328 highlights the urgent need for novel approaches such as GSMMs to understand the mechanisms  
19  
20  
21 329 of antibacterial activity and resistance. The main utility of GSMMs is their ability to bridge  
22  
23 330 critical gaps between genomics and metabolic phenotypes through the prediction of metabolic  
24  
25  
26 331 responses to antimicrobial treatments at the network level. Here, we report the development,  
27  
28 332 optimisation, validation and application of a high-quality GSMM designated *iPAO1* for a type  
29  
30  
31 333 strain *P. aeruginosa* PAO1; and importantly, *iPAO1* was employed to understand the  
32  
33 334 complicated effect of polymyxin treatment on bacterial metabolism. Simulation with *iPAO1*  
34  
35  
36 335 showed that lipid A modifications in response to polymyxin treatment only exert minor effects  
37  
38 336 on bacterial growth and metabolism. Albeit, further calculations that integrate transcriptomics  
39  
40  
41 337 data as model constraints revealed that polymyxin treatment may reduce growth and affect a  
42  
43 338 broad range of pathways.

44  
45  
46 339 *iPAO1* represents the most comprehensive metabolic model for *P. aeruginosa* to date and  
47  
48 340 incorporates 1,458 genes, accounting for ~25.8% of the PAO1 genome. Among the four  
49  
50  
51 341 GSMMs developed for *P. aeruginosa* PAO1, *iMO1086* and *iPae1146* were constructed on the  
52  
53 342 basis of *iMO1056* with moderate increase of metabolites, reactions and genes [25, 27, 28];  
54  
55  
56 343 *Opt208964* is also in a medium size, which limits modelling capacity [26]. In contrast, *iPAO1*  
57  
58 344 is significantly expanded in model scale, by doubling or even tripling the numbers of  
59  
60  
61  
62  
63  
64  
65

1  
2  
3  
4  
5  
6  
7  
8  
9  
10  
11  
12  
13  
14  
15  
16  
17  
18  
19  
20  
21  
22  
23  
24  
25  
26  
27  
28  
29  
30  
31  
32  
33  
34  
35  
36  
37  
38  
39  
40  
41  
42  
43  
44  
45  
46  
47  
48  
49  
50  
51  
52  
53  
54  
55  
56  
57  
58  
59  
60  
61  
62  
63  
64  
65

345 metabolites and reactions (**Fig 3A**). *iPAO1* achieved an unprecedented prediction accuracy of  
346 89.1% for growth on various nutrients, outperforming all of the previously reported GSMMs  
347 for *P. aeruginosa* [25-28]. The *iPAO1* model was also employed to predict gene essentiality  
348 with a high accuracy of 87.9%. Given the extensive curation and significant expansion, *iPAO1*  
349 will serve as the primary reference for future development of metabolic models, particularly  
350 for other *P. aeruginosa* strains.

351 Unlike *iPAO1*, none of the previous *P. aeruginosa* GSMMs incorporated the periplasm. As  
352 polymyxins initially target LPS in the OM and can cause substantial changes in the cell  
353 envelope, the periplasmic space is a major component in *iPAO1*. The periplasmic space of *E.*  
354 *coli* is estimated to constitute up to 16% of total cell volume [67]. It contains a thin cell wall  
355 composed of peptidoglycan and a variety of ions and proteins, which are involved in transport,  
356 folding, cell envelope biogenesis, electron transport and xenobiotic metabolism [68]. *iPAO1* is  
357 the first *P. aeruginosa* GSMM to incorporate the periplasmic compartment, enabling accurate  
358 representation of metabolic machinery, especially for those reactions that occur exclusively in  
359 this important cellular space and transport of substrates across the IM and OM. Furthermore,  
360 *iPAO1* provides detailed representations of GPL and LPS biosynthesis which allows the  
361 precise mapping of GPL and LPS responses from experimental metabolomics and lipidomics  
362 data (**Figs 1 and 2**).

363 In response to polymyxin treatment, Gram-negative bacteria modify their lipid A with cationic  
364 moieties (i.e. phosphoethanolamine and L-Ara4N) that act to repel the like-charge of the  
365 polymyxin molecule [37]. Based on our simulations (**Additional file 20**), we purport that such  
366 lipid A modifications exerted a limited impact on cellular metabolism and growth. Most of the  
367 flux changes were insignificant; the remaining significant flux changes mainly resulted from  
368 futile cycles containing sets of reactions using redox equivalents, whereas the net carbon flow  
369 remained unchanged. Simulation using randomised lipid A compositions further consolidated

1  
2  
3  
4  
5  
6  
7  
8  
9  
10  
11  
12  
13  
14  
15  
16  
17  
18  
19  
20  
21  
22  
23  
24  
25  
26  
27  
28  
29  
30  
31  
32  
33  
34  
35  
36  
37  
38  
39  
40  
41  
42  
43  
44  
45  
46  
47  
48  
49  
50  
51  
52  
53  
54  
55  
56  
57  
58  
59  
60  
61  
62  
63  
64  
65

370 our hypothesis that lipid A modifications cause only moderate variations of bacterial growth  
371 and metabolism (**Fig 5, Additional file 23**). Notwithstanding, our simulation results revealed  
372 that lipid A modifications result in substantial physiochemical changes in the OM of *P.*  
373 *aeruginosa*, including (i) neutralising the surface negative charge by addition of positively  
374 changed L-Ara4N; and (ii) altering the polarity and hydrophobicity by acylation and  
375 deacylation. The general mode of action of polymyxin involves the initial electrostatic  
376 interaction between the cationic side chains of the polymyxin molecule with the anionic lipid  
377 A head groups [60]. These events are subsequently followed by hydrophobic interactions  
378 between the *N*-terminal fatty acyl chain and position 6/7 hydrophobic side chains of the  
379 polymyxin with the hydrophobic fatty acyls of lipid A [60]. Therefore, in concept both the  
380 addition of L-Ara4N and deacylation of lipid A should contribute to polymyxin resistance.  
381 Indeed, our recent transcriptomic and neutron reflectometry studies discovered that deletion of  
382 the corresponding gene *pagL* (PA4661) resulted in an increased susceptibility to polymyxins,  
383 in a polymyxin-resistant mutant PAK*pmrB6* derived from *P. aeruginosa* PAK [14, 69],  
384 demonstrating that the lipid A deacylation also plays a key role in the response of *P. aeruginosa*  
385 to polymyxin treatment.

386 Our recent transcriptomics and metabolomics studies discovered that polymyxin treatment  
387 leads to remarkable growth reduction and metabolic perturbations in Gram-negative bacteria  
388 [38, 39, 70-72]. The integration of transcriptomics results into GSMMs allow for more accurate  
389 predictions of metabolic responses to either environmental (i.e. antibiotic treatment) or genetic  
390 perturbations (i.e. mutations) [73]. In the present study, we employed the E-Flux method to  
391 integrate transcriptomics data as flux constraints [74]. E-Flux can map continuous gene  
392 expression levels to the metabolic network and uses the transcript abundance to determine the  
393 degree to which a reaction is active or inactive [74]. Therefore, E-Flux provides a more  
394 physiologically relevant description of the continuous nature of the reaction activity and avoids

1  
2  
3  
4  
5  
6  
7  
8  
9  
10  
11  
12  
13  
14  
15  
16  
17  
18  
19  
20  
21  
22  
23  
24  
25  
26  
27  
28  
29  
30  
31  
32  
33  
34  
35  
36  
37  
38  
39  
40  
41  
42  
43  
44  
45  
46  
47  
48  
49  
50  
51  
52  
53  
54  
55  
56  
57  
58  
59  
60  
61  
62  
63  
64  
65

395 to use any artificial thresholds to binarise gene expression data [75]. Comparison of the  
396 calculated flux distributions revealed that a broad range of metabolic perturbations occur in  
397 response to polymyxin treatment (**Fig 6**), ranging from central carbon metabolism to oxidative  
398 phosphorylation and amino acid metabolism. Reduced growth, increased redox turnover and  
399 decreased energy turnover due to polymyxin treatment were evident (**Fig 6**), indicating that  
400 bacterial cells regulated their metabolism to produce more redox power to cope with the  
401 oxidative stress. This is consistent with previous findings that showed bactericidal antibiotics  
402 induced lethal oxidative damages via generating highly deleterious free radicals with  
403 subsequent culmination of cellular death [76]. In addition, our simulations revealed that  
404 polymyxin treatment induced an uptake of L-alanine, which was catabolised to generate more  
405 NADH (**Fig 7**). This indicates that rich media (e.g. CAMHB) may provide abundant amino  
406 acids and peptides that can be utilised by bacterial cells to generate sufficient redox equivalents  
407 to cope with the oxidative damage caused by polymyxin treatment. Furthermore, our  
408 simulation results also showed an upregulated metabolic flux towards L-spermidine  
409 biosynthesis upon polymyxin B treatment (rxn00127 and rxn01406, **Additional file 25**).  
410 Previous studies showed that polyamines (e.g. spermidine) could protect *P. aeruginosa* from  
411 antimicrobial peptide killing [77]. It is assumed that the cationic spermidine could interact with  
412 the anionic LPS, mask the negative cell surface, and reduce the electrostatic interactions  
413 between polymyxin B and bacterial OM. Therefore, the enhanced biosynthesis of spermidine  
414 might increase its abundance at the cell surface and contribute to polymyxin resistance.

415 The constructed *i*PAO1 provides a detailed presentation of LPS biogenesis (**Fig 2**), in particular  
416 lipid A modifications. Further integration with specific regulatory modules will enable  
417 dynamic simulation of metabolic responses to polymyxin treatment. Previous studies revealed  
418 that various two-component regulatory systems (2CSs), including PhoPQ, PmrAB, ParRS,  
419 CprRS and ColRS, play key roles in regulating polymyxin resistance [78-82]. Among them,

1  
2  
3  
4  
5  
6  
7  
8  
9  
10  
11  
12  
13  
14  
15  
16  
17  
18  
19  
20  
21  
22  
23  
24  
25  
26  
27  
28  
29  
30  
31  
32  
33  
34  
35  
36  
37  
38  
39  
40  
41  
42  
43  
44  
45  
46  
47  
48  
49  
50  
51  
52  
53  
54  
55  
56  
57  
58  
59  
60  
61  
62  
63  
64  
65

420 the PmrAB and PhoPQ systems are able to sense the depletion of external cations (e.g. Mg<sup>2+</sup>  
421 and Ca<sup>2+</sup>) and upregulate the expression of the *arnBCADTEF-ugd* operon which is responsible  
422 for the modification of lipid A with L-Ara4N [83]. Moreover, the fatty acylation of lipid A by  
423 PagP is under the control of PhoPQ [84, 85]. ParRS and CprRS are independent 2CSs that  
424 mediate the upregulation of *pmrAB*, *arnBCADTEF-ugd* operon, *pagL* and adaptive resistance  
425 in response to polymyxin treatment [78, 86]. In overview, lipid A modifications due to  
426 polymyxin treatment are strictly controlled by very complex regulatory networks involving  
427 signal sensors, transcriptional regulators, and metabolic enzymes. Therefore, future studies are  
428 warranted to integrate these regulatory modules into the GSMM to enable simulating bacterial  
429 response dynamics to polymyxin treatment and analysing adaptive resistance mechanisms in  
430 *P. aeruginosa*.

431 Overall, we have constructed, optimised and validated a high-quality genome-scale metabolic  
432 model *iPAO1* for *P. aeruginosa* PAO1. This comprehensive model incorporates metabolic  
433 pathways, particularly the biogenesis of membrane components, and enables delineating the  
434 complex metabolic responses to antibiotics. *iPAO1* provides a valuable systems tool for  
435 quantitative simulation of bacterial metabolic responses to antibiotics, elucidation of the  
436 molecular mechanisms of antimicrobial killing and resistance, and facilitation of designing  
437 rational antimicrobial combination therapy. To the best of our knowledge, this study is the first  
438 to integrate antimicrobial pharmacology, computational biology, metabolic network and  
439 systems pharmacology to analyse large-scale datasets, in order to better understand the  
440 dynamic and complex nature of polymyxin killing and resistance. Combined with antibiotic  
441 pharmacokinetics and pharmacodynamics, *iPAO1* offers an *in silico* platform for precision  
442 antimicrobial pharmacology therapy.

443  
444 **Potential implications**

1 445 The generated collection of transcriptomics metabolomics, lipidomics and lipid A profiling  
2 446 data provides comprehensive datasets of *P. aeruginosa* for future integrative analysis of  
3  
4 447 polymyxin systems pharmacology. As the largest curated GSMM thus far for any Gram-  
5  
6  
7 448 negative bacteria, *i*PAO1 represents all aspects of the cellular metabolism and may serve as the  
8  
9 449 platform for integrative analysis of multi-omics data. Simulation with transcriptomics  
10  
11 450 constraints in this study revealed metabolic flux changes in amino acid catabolism,  
12  
13 451 tricarboxylic acid cycle, and redox turnover caused by polymyxin treatment. Correlative  
14  
15 452 analysis of metabolomics and transcriptomics with the constraint-based modelling is necessary  
16  
17 453 for delineating the regulatory effects on metabolism. The methodology of using GSMMs to  
18  
19 454 analyse multi-level omics data is applicable to other areas beyond antimicrobial pharmacology.  
20  
21  
22 455 Further integration with antimicrobial pharmacokinetics and pharmacodynamics will not only  
23  
24 456 provide better pharmacological understanding, but also empower the model to quantitatively  
25  
26 457 predict the bacterial responses to antimicrobial therapy in the context of complex interplay of  
27  
28 458 signalling, transcriptional regulation and metabolism. In summary, our GSMM approach  
29  
30 459 provides a powerful systems tool to elucidate the complex mode of action of antibiotics and  
31  
32 460 will paradigm shift antimicrobial pharmacology.  
33  
34  
35  
36  
37  
38  
39  
40  
41

40 461

## 42 462 **Methods**

### 45 463 **Strain, media and BIOLOG experiments**

47  
48 464 *P. aeruginosa* PAO1 was cultured in Luria-Bertani (LB) media and subcultured on nutrient  
49  
50 465 agar. Cells were swapped into sterile capped tube containing 16 mL IF-0 solution (Cell  
51  
52 466 Biosciences, West Heidelberg, Australia) till the turbidity achieved 42% transmittance in a  
53  
54 467 Turbidimeter (Pacificlub, Blackburn, Australia). The cell suspension was then diluted 5 times  
55  
56 468 with IF-0 solution and dye (Cell Biosciences) to final 85% transmittance. BIOLOG PM 1-3  
57  
58  
59  
60  
61  
62  
63  
64  
65

1  
2  
3  
4  
5  
6  
7  
8  
9  
10  
11  
12  
13  
14  
15  
16  
17  
18  
19  
20  
21  
22  
23  
24  
25  
26  
27  
28  
29  
30  
31  
32  
33  
34  
35  
36  
37  
38  
39  
40  
41  
42  
43  
44  
45  
46  
47  
48  
49  
50  
51  
52  
53  
54  
55  
56  
57  
58  
59  
60  
61  
62  
63  
64  
65

469 (Cell Biosciences, Heidelberg, Australia) were used to investigate the carbon and nitrogen  
470 utilisation with two independent biological replicates. Sodium succinate was used as the carbon  
471 source for examining nitrogen utilization. Growth was detected after 24-h incubation at 37°C,  
472 using an Infinite M200 microplate reader (Tecan, Mannedorf, Switzerland) at 595 nm.  
473 Readings that were  $\geq 1.5$ -fold of the negative control (i.e. growth media without bacteria)  
474 indicated the utilisation of nutrients.

### 475 **Development of a GSMM for *P. aeruginosa* PAO1**

476 To expedite the model development, two curated models for PAO1 with the same identifier  
477 systems from Model SEED [29], iMO1056 [25] and Opt20896434 [26] were merged.  
478 Databases including KEGG [41], MetaCyc [42], Pseudomonas Genome DB [45] and the  
479 literature were employed to complete the model with missing components. The identifiers of  
480 metabolites and reactions were kept consistent with Model SEED [26], and cross-referred to  
481 MetaCyc, KEGG, PubChem [61], ChEBI [63], ChemSpider [62] and BiGG [64]. The PAO1  
482 genome annotation from Pseudomonas Genome DB [45] was employed to construct ‘gene to  
483 protein to reaction’ (GPR) associations [87]. A periplasm compartment was incorporated into  
484 the model. Reactions and metabolites were then assigned to cytoplasm, periplasm and external  
485 environment according to the localisation prediction of metabolic enzymes by PSORTb 3.0  
486 [88]. Transport reactions were generated to enable material exchange across membranes  
487 according to TCBD [43] and TransporterDB [44]. The model was constructed using the  
488 Systems Biology Markup Language (SBML) [89, 90]. VANTED [91] was employed for  
489 visualisation and analysis of the metabolic network. For each metabolite in the model, specific  
490 features including compartment localisation, mass, charge, formula, formation free energy,  
491 database identifiers and source were added (**Additional file 14**). Each reaction entered into the  
492 model was checked with elementary and charge balance. Reversibility was determined first  
493 from the primary literature for each particular enzyme or reaction, if available. Further curation

1  
2 494 on reaction reversibility and directions was conducted based on change of free energy and  
3 495 knowledge about the physiological direction of a reaction in a pathway.  
4

5 496 The Gapfind function from the COBRA toolbox [92] was employed to identify the isolated and  
6  
7 497 dead-end metabolites in the model. Candidate reactions from KEGG, MetaCyc and BiGG were  
8  
9  
10 498 manually inspected for relevance and homology evidence using BLASTp; reactions catalysed  
11  
12 499 by homologous enzymes (E-value<1×10<sup>-5</sup>, identity≥35%, coverage≥50%) were added to the  
13  
14  
15 500 model to eliminate the gaps. Mispredictions of BIOLOG growth phenotypes were employed to  
16  
17 501 refine the draft model (*i*PAO1\_draft2). Further curation was performed to represent the  
18  
19  
20 502 complex biosynthesis pathways of macromolecules (e.g. peptidoglycan, GPL and LPS).  
21

22  
23 503 The biomass formation equation consisting of necessary building blocks for bacterial growth  
24  
25 504 was created using the one from iMO1086 [27], with slight modifications on compositions of  
26  
27  
28 505 ions, peptidoglycans, GPL and LPS (**Additional file 17**). The growth and non-growth  
29  
30 506 associated maintenance was from iMO1086 [27].  
31

### 32 33 507 **Growth prediction in BIOLOG media**

34  
35  
36 508 *i*PAO1 was employed to predict the growth phenotypes on chemically-defined media with 190  
37  
38  
39 509 carbon and 95 nitrogen sources (**Additional file 18**) using the FBA method [24]. The objective  
40  
41 510 function of biomass formation was maximised with the specific nutrient uptake rate set at 10  
42  
43 511 mmol·gDW·h<sup>-1</sup> under aerobic condition.  
44

45  
46 512 
$$\max \quad v_{\text{biomass}}$$

47  
48  
49 513 
$$s. t. \quad \mathbf{Sv} = 0$$

50  
51  
52 514 
$$a_i \leq v_i \leq b_i, i = 1, 2, \dots, n$$

53  
54  
55 515 where  $v_{\text{biomass}}$  denotes the biomass formation flux,  $\mathbf{S}$  represents the stoichiometric matrix and  
56  
57  
58 516 each metabolic flux  $v_i$  was constrained by lower and upper bound  $a_i$  and  $b_i$ , respectively. All  
59  
60  
61  
62  
63  
64  
65



1 517 modelling procedures were performed with the COBRA toolbox [92] in MATLAB. The  
2 518 calculated specific growth rates  $\nu_{\text{biomass}}$  were then compared to the BIOLOG PM data to assess  
3  
4 519 the prediction accuracy using Fisher's exact test.  
5  
6

## 7 520 **Gene essentiality prediction**

8  
9  
10 521 *In silico* single-gene deletion was performed using the CORBRA toolbox and the mutant  
11  
12 522 models were then used to predict the specific growth rate in LB broth [29] using FBA. Genes  
13  
14 523 with 99% reduction of the specific growth rate relative to the wild type were defined as essential  
15  
16 524 for cell growth; otherwise, they were considered as semi-essential (1-99% reduction) and non-  
17  
18 525 essential (<1% reduction). Two existing PAO1 transposon insertion mutant libraries, (i) two-  
19  
20 526 allele mutant library [47, 65] and (ii) mini-Tn5 insertion mutant library [46], were employed  
21  
22  
23 527 to assess the overall prediction accuracy with Fisher's exact test.  
24  
25  
26  
27

## 28 528 **Simulation of bacterial growth and metabolic phenotype changes in response to lipid A** 29 30 529 **modifications**

31  
32  
33 530 The LPS stoichiometric coefficients in the biomass formula under the control and lipid A  
34  
35 531 modification conditions were set according to the measured lipid A compositions in the wild-  
36  
37 532 type *P. aeruginosa* PAK and its polymyxin-resistant mutant PAK $_{pmrB6}$ , respectively (**Table**  
38  
39 533 **2**) [14]. For PAK $_{pmrB6}$ , a missense mutation (L243Q) in *pmrB* resulted in constitutive  
40  
41 534 activation of the PmrAB system and induced expression of the regulated genes regardless of  
42  
43 535 polymyxin, including *arn* operon and *pagL* [39, 93]. Aerobic growth was simulated on minimal  
44  
45 536 media with glucose uptake at  $10 \text{ mmol} \cdot \text{gDW}^{-1} \cdot \text{L}^{-1}$ . For each simulation, the solution space was  
46  
47 537 sampled with 10,000 random points using the ll-ACHRB algorithm [94]. Flux samples of the  
48  
49 538 control and lipid A modification were then compared. Significantly perturbed metabolic fluxes  
50  
51 539 were identified using a Z-score based approach [95].  
52  
53  
54  
55  
56  
57

58 540 To further analyse the metabolic impact of lipid A modifications, the proportions of all types  
59  
60  
61  
62  
63  
64  
65

1  
2  
3  
4  
5  
6  
7  
8  
9  
10  
11  
12  
13  
14  
15  
16  
17  
18  
19  
20  
21  
22  
23  
24  
25  
26  
27  
28  
29  
30  
31  
32  
33  
34  
35  
36  
37  
38  
39  
40  
41  
42  
43  
44  
45  
46  
47  
48  
49  
50  
51  
52  
53  
54  
55  
56  
57  
58  
59  
60  
61  
62  
63  
64  
65

541 of LPS in the biomass formula were randomly assigned and the process was repeated 1,000  
542 times. For each repetition, the specific growth rates were calculated and solution space was  
543 sampled using the methods above. For each type of lipid A, specific physiochemical properties  
544 (*f*) including total atom number, partition coefficient (logP), average charge and molecular  
545 polarity were predicted at pH 7 using the cxcalc tool from ChemAxon (Budapest, Hungary).  
546 The overall apparent properties *F* of the OM were estimated by calculating the weighted sum.

$$F = \sum_{i=1}^n w_i f_i$$

547  
548 where  $w_i$  represents the stoichiometric coefficient of the *i*-th of 288 heterogeneous LPS  
549 molecules in the biomass formula. Pairwise correlation analysis was conducted between lipid  
550 A modifications, physiochemical properties changes, bacterial growth and metabolism  
551 alterations.

### 552 **Predict metabolic responses to polymyxin treatment by constraining fluxes with** 553 **transcriptomics data**

554 The RNA-Seq data from 1-h 1 mg·L<sup>-1</sup> polymyxin B treatment experiment using PAO1 were  
555 employed as flux constraints for modelling [48]. For each gene under every condition, the  
556 RPKM (Reads Per Kilobase Million) value was calculated from the aligned reads using the  
557 edgeR package [96], and normalised to constrain flux upper bounds using the E-Flux algorithm  
558 [74]. Since CAMHB was used in the RNA-Seq experiment, the maximum uptake rates of  
559 amino acids, vitamins and dipeptides in *i*PAO1 were set to 1 mmol·gDW·h<sup>-1</sup> considering that  
560 these nutrients in CAMHB provided the major carbon sources for bacterial growth. For each  
561 condition, the solution space was sampled with 10,000 points using ll-ACHRB as above.  
562 Statistical significance of differential flux distributions was computed using the Z-score method  
563 above. The turnover rate for key metabolites was calculated by summing up all influxes or

1  
2  
3 564 effluxes [97].  
4

5  
6 565

7  
8  
9 **566 Availability of supporting data and materials**

10  
11 567 The raw RNA-Seq data have been deposited in the NCBI Sequence Read Archive (SRA)

12 database under the BioProject accession number (to be updated). The metabolomics and

13 569 lipidomics data have been deposited in Metabolight database with the accession number (to be

14 updated).  
15  
16 570

17  
18  
19 571

20  
21  
22 **572 Additional files**

23  
24  
25 573 Additional file 1 (additionalFile1.docx): Manual curation of GPL biosynthesis, LPS

26 biosynthesis and modification pathways.  
27  
28 574

29  
30 575 Additional file 2 (additionalFile2.xlsx): Metabolites in the constructed draft model

31 *i*PAO1\_draft1.  
32  
33 576

34  
35  
36 577 Additional file 3 (additionalFile3.xlsx): Reactions in the constructed draft model *i*PAO1\_draft1.

37  
38  
39 578 Additional file 4 (additionalFile4.xlsx): Genes in the constructed draft model *i*PAO1\_draft1.

40  
41  
42 579 Additional file 5 (additionalFile5.xlsx). Supplemented metabolites according to previous GC-

43 MS based metabolomics data.  
44  
45 580

46  
47 581 Additional file 6 (additionalFile6.xlsx): Supplemented reactions according to previous GS-MS

48 based metabolomics data.  
49  
50 582

51  
52 583 Additional file 7 (additionalFile7.xlsx): Root gap metabolites identified using GapFind from

53 the COBRA toolbox.  
54  
55 584

56  
57  
58 585 Additional file 8 (additionalFile8.xlsx): Comparison of the predicted growth phenotypes with

59  
60  
61  
62  
63  
64  
65

1  
2  
3 586 the BIOLOG PM results.

4  
5 587 Additional file 9 (additionalFile9.xlsx): Reactions with changed reversibility and directionality  
6  
7 588 during manual curation.

8 589 Additional file 10 (additionalFile10.xlsx): Deleted metabolites during manual curation.

9  
10  
11 590 Additional file 11 (additionalFile11.xlsx): Deleted reactions during manual curation.

12  
13  
14 591 Additional file 12 (additionalFile12.xlsx): Added reactions during manual curation.

15  
16  
17 592 Additional file 13 (additionalFile13.xlsx): Added intermediate metabolites in GPL biosynthesis  
18  
19 593 pathway.

20  
21  
22 594 Additional file 14 (additionalFile14.xlsx): Added reactions in GPL biosynthesis pathway.

23  
24  
25 595 Additional file 15 (additionalFile15.xlsx): Metabolites in the constructed model *iPAO1*.

26  
27  
28 596 Additional file 16 (additionalFile16.xlsx): Reactions in the constructed model *iPAO1*.

29  
30  
31 597 Additional file 17 (additionalFile17.xlsx): Genes in the constructed model *iPAO1*.

32  
33  
34 598 Additional file 18 (additionalFile18.xlsx): Biomass formation formula.

35  
36  
37 599 Additional file 19 (additionalFile19.xlsx): Comparison of the predicted gene essentiality with  
38  
39 600 the information derived from two transposon insertion mutant libraries.

40  
41  
42 601 Additional file 20 (additionalFile20.xlsx): Metabolic flux changes in response to lipid A  
43  
44 602 modifications using lipidomics data as stoichiometric constraints.

45  
46  
47  
48 603 Additional file 21 (additionalFile21.xlsx): Randomised stoichiometric coefficients of LPS  
49  
50 604 species.

51  
52  
53 605 Additional file 22 (additionalFile22.xlsx): Predicted physiochemical properties of lipid A  
54  
55 606 molecules.

56  
57  
58  
59 607 Additional file 23 (additionalFile23.xlsx): Metabolic flux changes in response to lipid A  
60  
61  
62  
63  
64  
65

1  
2  
3 608 modifications with randomly assigned lipid A compositions as stoichiometric constraints.  
4

5 609 Additional file 24 (additionalFile24.xlsx): Metabolic flux constraints calculated based on  
6 RNA-Seq data.  
7

8 611 Additional file 25 (additionalFile25.xlsx): Metabolic flux changes in response to polymyxin  
9 treatment using RNA-Seq data as flux constraints.  
10

11 612  
12  
13 613 Additional file 26 (additionalFile26.xlsx): Metabolite turnover rates.  
14

15  
16 614 Additional file 27 (additionalFile27.xlsx): Full names of the metabolite abbreviations in Figure  
17  
18 1.  
19

20  
21  
22 616  
23

#### 24 25 617 **List of abbreviations** 26

27  
28 618 2CS: two-component regulatory system; CAMHB: cation-adjusted Mueller-Hinton broth;  
29

30 619 COG: clusters of orthologous groups; FBA: flux balance analysis; FDR: false discovery rate;  
31

32  
33 620 GC-MS: gas chromatography-mass spectrometry; GPL: Glycerolphospholipid; GPR: gene to  
34

35 621 protein to reaction; GSMM: genome-scale metabolic models; IM: Inner membrane; KEGG:  
36

37  
38 622 Kyoto Encyclopaedia of Genes and Genomes; L-Ara4N: 4-Amino-4-deoxy-L-arabinose; LB:  
39

40 623 Luria-Bertani; LC-MS: liquid chromatography-mass spectrometry; LPS: lipopolysaccharide;  
41

42 624 MDR: Multidrug-resistant; OM: outer membrane; PM: Phenotypic Microarray; RPKM: Reads  
43

44  
45 625 Per Kilobase Million; SBML: Systems Biology Markup Language; SRA: Sequence Read  
46

47 626 Archive; TCDB: Transporter Classification Database.  
48  
49

50 627  
51

#### 52 53 628 **Competing interests** 54

55  
56 629 The authors declare no competing interest for this work.  
57  
58

59 630  
60  
61  
62  
63  
64  
65

1  
2  
3 **631 Funding**

4  
5 **632** This study was partially supported by a Major Interdisciplinary Research Grant from Monash  
6  
7 **633** University and a project grant by the Australian National Health and Medical Research Council  
8 **634** (NHMRC, APP1127948). J.L., T.V., and J.S. are supported by the National Institute of Allergy  
9  
10 **635** and Infectious Diseases of the National Institutes of Health (R01 AI111965). The content is  
11  
12 **636** solely the responsibility of the authors and does not necessarily represent the official views of  
13  
14 **637** the National Institute of Allergy and Infectious Diseases or the National Institutes of Health.  
15  
16 **638** T.V. is an Australian NHMRC Career Development Research Fellow. T.L. is an Australian  
17  
18 **639** Laureate Fellow supported by Australian Research Council. J.L. is an Australian NHMRC  
19  
20 **640** Senior Research Fellow.  
21  
22  
23  
24

25 **641**

26  
27  
28 **642 Authors' contributions**

29  
30  
31 **643** J.L. and F.S. conceived the project and Y.Z. developed the GSMM and conducted most  
32  
33 **644** analysis. T.C. and M.K. validated the model. J.Z., J.Lu and B.S. curated the model. T.V., T.L.  
34  
35 **645** and J.S. helped supervise the project. M.H. and M.H.M.M. provided the lipidomics and  
36  
37 **646** transcriptomics data, respectively.  
38  
39  
40

41 **647**

42  
43  
44 **648 Acknowledgements**

45  
46  
47 **649** The authors acknowledge the assistance of Dr Darren Creek from the Monash Institute of  
48  
49 **650** Pharmaceutical Sciences in LC-MS experiments.  
50  
51

52  
53 **651**

54  
55  
56 **652 References**

57  
58  
59  
60  
61  
62  
63  
64  
65

- 1  
2  
3  
4  
5  
6  
7  
8  
9  
10  
11  
12  
13  
14  
15  
16  
17  
18  
19  
20  
21  
22  
23  
24  
25  
26  
27  
28  
29  
30  
31  
32  
33  
34  
35  
36  
37  
38  
39  
40  
41  
42  
43  
44  
45  
46  
47  
48  
49  
50  
51  
52  
53  
54  
55  
56  
57  
58  
59  
60  
61  
62  
63  
64  
65
- 653 1. Scales BS, Dickson RP, LiPuma JJ and Huffnagle GB. Microbiology, genomics, and  
654 clinical significance of the *Pseudomonas fluorescens* species complex, an  
655 unappreciated colonizer of humans. Clin Microbiol Rev. 2014;27:927-48.
  - 656 2. Breidenstein EB, de la Fuente-Nunez C and Hancock RE. *Pseudomonas aeruginosa*:  
657 all roads lead to resistance. Trends Microbiol. 2011;19:419-26.
  - 658 3. Liu YY, Wang Y, Walsh TR, Yi LX, Zhang R, Spencer J, et al. Emergence of plasmid-  
659 mediated colistin resistance mechanism MCR-1 in animals and human beings in China:  
660 a microbiological and molecular biological study. Lancet Infect Dis. 2016;16:161-8.
  - 661 4. Winstanley C, O'Brien S and Brockhurst MA. *Pseudomonas aeruginosa* evolutionary  
662 adaptation and diversification in cystic fibrosis chronic lung infections. Trends  
663 Microbiol. 2016;24:327-37.
  - 664 5. de Almeida Silva KCF, Calomino MA, Deutsch G, de Castilho SR, de Paula GR, Esper  
665 LMR, et al. Molecular characterization of multidrug-resistant (MDR) *Pseudomonas*  
666 *aeruginosa* isolated in a burn center. Burns. 2017;43:137-43.
  - 667 6. Church D, Elsayed S, Reid O, Winston B and Lindsay R. Burn wound infections. Clin  
668 Microbiol Rev. 2006;19:403-34.
  - 669 7. Klockgether J, Cramer N, Wiehlmann L, Davenport CF and Tummeler B. *Pseudomonas*  
670 *aeruginosa* genomic structure and diversity. Front Microbiol. 2011;2:150.
  - 671 8. Ramos JL and Filloux A. *Pseudomonas*: Volume 5: A model system in biology. London:  
672 Springer; 2007.
  - 673 9. Nation RL, Li J, Cars O, Couet W, Dudley MN, Kaye KS, et al. Framework for  
674 optimisation of the clinical use of colistin and polymyxin B: the Prato polymyxin  
675 consensus. Lancet Infect Dis. 2015;15:225-34.

- 676 10. Pedersen MG, Jensen-Fangel S, Olesen HV, Nørskov-Lauritsen N and Wang M. 129  
1  
2 677 Colistin resistance in *Achromobacter* sp. and *Pseudomonas aeruginosa* isolated from  
3  
4 678 Danish cystic fibrosis patients is not related to plasmid-mediated expression of *mcr-1*.  
5  
6  
7 679 J Cyst Fibros. 2017;16:S98.  
8  
9  
10 680 11. Wi YM, Choi JY, Lee JY, Kang CI, Chung DR, Peck KR, et al. Emergence of colistin  
11  
12 681 resistance in *Pseudomonas aeruginosa* ST235 clone in South Korea. Int J Antimicrob  
13  
14 682 Agents. 2017;49:767-9.  
15  
16  
17  
18 683 12. Yu Z, Qin W, Lin J, Fang S and Qiu J. Antibacterial mechanisms of polymyxin and  
19  
20 684 bacterial resistance. Biomed Res Int. 2015;2015:679109-19.  
21  
22  
23 685 13. Trimble MJ, Mlynarcik P, Kolar M and Hancock RE. Polymyxin: alternative  
24  
25 686 mechanisms of action and resistance. Cold Spring Harb Perspect Med. 2016;6:a025288.  
26  
27  
28 687 14. Han M, Zhu Y, Cheah SE, Johnson MD, Yu H, Shen HH, et al. Polymyxin resistance  
29  
30 688 in *Pseudomonas aeruginosa*: metabolomic changes underpin lipid A modifications. In:  
31  
32 689 *ASM Microbe 2017* Boston, USA, 2016, p.491.  
33  
34  
35  
36 690 15. Hussein MH, Maifiah MHM, Han M, Tran TB, Zhu Y, Hancock REW, et al.  
37  
38 691 Mechanisms of synergistic killing against *Pseudomonas aeruginosa* by polymyxin B  
39  
40 692 and amikacin: A metabolomics study. In: *European Congress of Clinical Microbiology*  
41  
42 693 *and Infectious Diseases* Vienna, Austria, 2017, p.EV0387. ESCMID.  
43  
44  
45  
46 694 16. O'Brien EJ, Monk JM and Palsson BO. Using genome-scale models to predict  
47  
48 695 biological capabilities. Cell. 2015;161:971-87.  
49  
50  
51  
52 696 17. Hohenschuh W, Hector R and Murthy GS. A dynamic flux balance model and  
53  
54 697 bottleneck identification of glucose, xylose, xylulose co-fermentation in  
55  
56 698 *Saccharomyces cerevisiae*. Bioresour Technol. 2015;188:153-60.  
57  
58  
59  
60  
61  
62  
63  
64  
65



- 699 18. Hanly TJ and Henson MA. Dynamic metabolic modeling of a microaerobic yeast co-  
1  
2 700 culture: predicting and optimizing ethanol production from glucose/xylose mixtures.  
3  
4 701 Biotechnol Biofuels. 2013;6:44.  
5  
6  
7 702 19. Hanly TJ and Henson MA. Dynamic flux balance modeling of microbial co-cultures  
8  
9 703 for efficient batch fermentation of glucose and xylose mixtures. Biotechnol Bioeng.  
10  
11 704 2011;108:376-85.  
12  
13  
14 705 20. Bosi E, Monk JM, Aziz RK, Fondi M, Nizet V and Palsson BO. Comparative genome-  
15  
16 706 scale modelling of *Staphylococcus aureus* strains identifies strain-specific metabolic  
17  
18 707 capabilities linked to pathogenicity. Proc Natl Acad Sci U S A. 2016;113:E3801-9.  
19  
20  
21 708 21. Kim HU, Kim SY, Jeong H, Kim TY, Kim JJ, Choy HE, et al. Integrative genome-scale  
22  
23 709 metabolic analysis of *Vibrio vulnificus* for drug targeting and discovery. Mol Syst Biol.  
24  
25 710 2011;7:460.  
26  
27  
28 711 22. Krueger AS, Munck C, Dantas G, Church GM, Galagan J, Lehar J, et al. Simulating  
29  
30 712 serial-target antibacterial drug synergies using flux balance analysis. PLoS One.  
31  
32 713 2016;11:e0147651.  
33  
34  
35 714 23. Aziz RK, Monk JM, Lewis RM, In Loh S, Mishra A, Abhay Nagle A, et al. Systems  
36  
37 715 biology-guided identification of synthetic lethal gene pairs and its potential use to  
38  
39 716 discover antibiotic combinations. Scientific reports. 2015;5:16025.  
40  
41  
42 717 24. Bordbar A, Monk JM, King ZA and Palsson BO. Constraint-based models predict  
43  
44 718 metabolic and associated cellular functions. Nat Rev Genet. 2014;15:107-20.  
45  
46  
47 719 25. Oberhardt MA, Puchalka J, Fryer KE, Martins dos Santos VA and Papin JA. Genome-  
48  
49 720 scale metabolic network analysis of the opportunistic pathogen *Pseudomonas*  
50  
51 721 *aeruginosa* PAO1. J Bacteriol. 2008;190:2790-803.  
52  
53  
54  
55  
56  
57  
58  
59  
60  
61  
62  
63  
64  
65

- 1  
2  
3  
4  
5  
6  
7  
8  
9  
10  
11  
12  
13  
14  
15  
16  
17  
18  
19  
20  
21  
22  
23  
24  
25  
26  
27  
28  
29  
30  
31  
32  
33  
34  
35  
36  
37  
38  
39  
40  
41  
42  
43  
44  
45  
46  
47  
48  
49  
50  
51  
52  
53  
54  
55  
56  
57  
58  
59  
60  
61  
62  
63  
64  
65
- 722 26. Henry CS, DeJongh M, Best AA, Frybarger PM, Linsay B and Stevens RL. High-  
723 throughput generation, optimization and analysis of genome-scale metabolic models.  
724 Nat Biotechnol. 2010;28:977-82.
- 725 27. Oberhardt MA, Puchalka J, Martins dos Santos VA and Papin JA. Reconciliation of  
726 genome-scale metabolic reconstructions for comparative systems analysis. PLoS  
727 Comput Biol. 2011;7:e1001116.
- 728 28. Bartell JA, Blazier AS, Yen P, Thogersen JC, Jelsbak L, Goldberg JB, et al.  
729 Reconstruction of the metabolic network of *Pseudomonas aeruginosa* to interrogate  
730 virulence factor synthesis. Nat Commun. 2017;8:14631.
- 731 29. Devoid S, Overbeek R, DeJongh M, Vonstein V, Best AA and Henry C. Automated  
732 genome annotation and metabolic model reconstruction in the SEED and Model SEED.  
733 Methods Mol Biol. 2013;985:17-45.
- 734 30. Oberhardt MA, Goldberg JB, Hogardt M and Papin JA. Metabolic network analysis of  
735 *Pseudomonas aeruginosa* during chronic cystic fibrosis lung infection. J Bacteriol.  
736 2010;192:5534-48.
- 737 31. Biggs MB and Papin JA. Novel multiscale modeling tool applied to *Pseudomonas*  
738 *aeruginosa* biofilm formation. PLoS One. 2013;8:e78011.
- 739 32. Vital-Lopez FG, Reifman J and Wallqvist A. Biofilm formation mechanisms of  
740 *Pseudomonas aeruginosa* predicted via genome-scale kinetic models of bacterial  
741 metabolism. PLoS Comput Biol. 2015;11:e1004452.
- 742 33. Sigurdsson G, Fleming RM, Heinken A and Thiele I. A systems biology approach to  
743 drug targets in *Pseudomonas aeruginosa* biofilm. PLoS One. 2012;7:e34337.
- 744 34. Xu Z, Fang X, Wood TK and Huang ZJ. A systems-level approach for investigating  
745 *Pseudomonas aeruginosa* biofilm formation. PLoS One. 2013;8:e57050.

- 1  
2  
3  
4  
5  
6  
7  
8  
9  
10  
11  
12  
13  
14  
15  
16  
17  
18  
19  
20  
21  
22  
23  
24  
25  
26  
27  
28  
29  
30  
31  
32  
33  
34  
35  
36  
37  
38  
39  
40  
41  
42  
43  
44  
45  
46  
47  
48  
49  
50  
51  
52  
53  
54  
55  
56  
57  
58  
59  
60  
61  
62  
63  
64  
65
- 746 35. Perumal D, Samal A, Sakharkar KR and Sakharkar MK. Targeting multiple targets in  
747 *Pseudomonas aeruginosa* PAO1 using flux balance analysis of a reconstructed  
748 genome-scale metabolic network. *J Drug Target*. 2011;19:1-13.
- 749 36. Dalebroux ZD, Matamouros S, Whittington D, Bishop RE and Miller SI. PhoPQ  
750 regulates acidic glycerophospholipid content of the *Salmonella Typhimurium* outer  
751 membrane. *Proc Natl Acad Sci U S A*. 2014;111:1963-8.
- 752 37. Raetz CR, Reynolds CM, Trent MS and Bishop RE. Lipid A modification systems in  
753 Gram-negative bacteria. *Annu Rev Biochem*. 2007;76:295-329.
- 754 38. Maifiah MH, Creek DJ, Nation RL, Forrest A, Tsuji BT, Velkov T, et al. Untargeted  
755 metabolomics analysis reveals key pathways responsible for the synergistic killing of  
756 colistin and doripenem combination against *Acinetobacter baumannii*. *Sci Rep*.  
757 2017;7:45527.
- 758 39. Han ML, Zhu Y, Cheah S-E, Johnson MD, Yu HH, Maifiah MHM, et al. Polymyxin  
759 resistance due to mutations in *pmrB* caused global metabolomics changes in  
760 *Pseudomonas aeruginosa*. In: *The Australian & New Zealand Metabolomics*  
761 *Conference* Melbourne, Australia, 30 March 2016, p.106.
- 762 40. Frimmersdorf E, Horatzek S, Pelnikevich A, Wiehlmann L and Schomburg D. How  
763 *Pseudomonas aeruginosa* adapts to various environments: a metabolomic approach.  
764 *Environ Microbiol*. 2010;12:1734-47.
- 765 41. Kanehisa M, Sato Y, Kawashima M, Furumichi M and Tanabe M. KEGG as a reference  
766 resource for gene and protein annotation. *Nucleic Acids Res*. 2016;44:D457-62.
- 767 42. Caspi R, Billington R, Ferrer L, Foerster H, Fulcher CA, Keseler IM, et al. The  
768 MetaCyc database of metabolic pathways and enzymes and the BioCyc collection of  
769 pathway/genome databases. *Nucleic Acids Res*. 2016;44:D471-80.

- 1  
2  
3  
4  
5  
6  
7  
8  
9  
10  
11  
12  
13  
14  
15  
16  
17  
18  
19  
20  
21  
22  
23  
24  
25  
26  
27  
28  
29  
30  
31  
32  
33  
34  
35  
36  
37  
38  
39  
40  
41  
42  
43  
44  
45  
46  
47  
48  
49  
50  
51  
52  
53  
54  
55  
56  
57  
58  
59  
60  
61  
62  
63  
64  
65
- 770 43. Saier MH, Jr., Reddy VS, Tsu BV, Ahmed MS, Li C and Moreno-Hagelsieb G. The  
771 Transporter Classification Database (TCDB): recent advances. *Nucleic Acids Res.*  
772 2016;44:D372-9.
- 773 44. Elbourne LD, Tetu SG, Hassan KA and Paulsen IT. TransportDB 2.0: a database for  
774 exploring membrane transporters in sequenced genomes from all domains of life.  
775 *Nucleic Acids Res.* 2017;45:D320-D4.
- 776 45. Winsor GL, Griffiths EJ, Lo R, Dhillon BK, Shay JA and Brinkman FS. Enhanced  
777 annotations and features for comparing thousands of *Pseudomonas* genomes in the  
778 *Pseudomonas* genome database. *Nucleic Acids Res.* 2016;44:D646-53.
- 779 46. Lewenza S, Falsafi RK, Winsor G, Gooderham WJ, McPhee JB, Brinkman FS, et al.  
780 Construction of a mini-Tn5-*luxCDABE* mutant library in *Pseudomonas aeruginosa*  
781 PAO1: a tool for identifying differentially regulated genes. *Genome Res.* 2005;15:583-  
782 9.
- 783 47. Held K, Ramage E, Jacobs M, Gallagher L and Manoil C. Sequence-verified two-allele  
784 transposon mutant library for *Pseudomonas aeruginosa* PAO1. *J Bacteriol.*  
785 2012;194:6387-9.
- 786 48. Maifiah MHM. *Deciphering the modes of action of polymyxins and the synergistic*  
787 *combinations against multidrug-resistant Gram-negative bacteria: a systems*  
788 *pharmacology approach.* PhD thesis, Monash University, Australia, 2017.
- 789 49. Liao Y, Smyth GK and Shi W. The Subread aligner: fast, accurate and scalable read  
790 mapping by seed-and-vote. *Nucleic Acids Res.* 2013;41:e108.
- 791 50. Powell D: Degust. <http://degust.erc.monash.edu/> (2017). Accessed Oct 18 2017.

- 1  
2  
3  
4  
5  
6  
7  
8  
9  
10  
11  
12  
13  
14  
15  
16  
17  
18  
19  
20  
21  
22  
23  
24  
25  
26  
27  
28  
29  
30  
31  
32  
33  
34  
35  
36  
37  
38  
39  
40  
41  
42  
43  
44  
45  
46  
47  
48  
49  
50  
51  
52  
53  
54  
55  
56  
57  
58  
59  
60  
61  
62  
63  
64  
65
- 792 51. Creek DJ, Jankevics A, Burgess KE, Breitling R and Barrett MP. IDEOM: an Excel  
793 interface for analysis of LC-MS-based metabolomics data. *Bioinformatics*.  
794 2012;28:1048-9.
- 795 52. Satish Kumar V, Dasika MS and Maranas CD. Optimization based automated curation  
796 of metabolic reconstructions. *BMC Bioinformatics*. 2007;8:212.
- 797 53. Finn RD, Coghill P, Eberhardt RY, Eddy SR, Mistry J, Mitchell AL, et al. The Pfam  
798 protein families database: towards a more sustainable future. *Nucleic Acids Res*.  
799 2016;44:D279-85.
- 800 54. Zdobnov EM, Tegenfeldt F, Kuznetsov D, Waterhouse RM, Simao FA, Ioannidis P, et  
801 al. OrthoDB v9.1: cataloging evolutionary and functional annotations for animal,  
802 fungal, plant, archaeal, bacterial and viral orthologs. *Nucleic Acids Res*. 2017;45:D744-  
803 D9.
- 804 55. Hempel N, Görisch H and Mern DS. Gene *erca*, encoding a putative iron-containing  
805 alcohol dehydrogenase, is involved in regulation of ethanol utilization in *Pseudomonas*  
806 *aeruginosa*. *J Bacteriol*. 2013;195:3925-32.
- 807 56. Kohanski MA, Dwyer DJ and Collins JJ. How antibiotics kill bacteria: from targets to  
808 networks. *Nat Rev Microbiol*. 2010;8:423-35.
- 809 57. Typas A, Banzhaf M, Gross CA and Vollmer W. From the regulation of peptidoglycan  
810 synthesis to bacterial growth and morphology. *Nat Rev Microbiol*. 2011;10:123-36.
- 811 58. Cox E, Michalak A, Pagentine S, Seaton P and Pokorny A. Lysylated phospholipids  
812 stabilize models of bacterial lipid bilayers and protect against antimicrobial peptides.  
813 *Biochim Biophys Acta*. 2014;1838:2198-204.

- 1  
2  
3  
4  
5  
6  
7  
8  
9  
10  
11  
12  
13  
14  
15  
16  
17  
18  
19  
20  
21  
22  
23  
24  
25  
26  
27  
28  
29  
30  
31  
32  
33  
34  
35  
36  
37  
38  
39  
40  
41  
42  
43  
44  
45  
46  
47  
48  
49  
50  
51  
52  
53  
54  
55  
56  
57  
58  
59  
60  
61  
62  
63  
64  
65
- 814 59. Kondakova T, D'Heygere F, Feuilloley MJ, Orange N, Heipieper HJ and Duclairoir Poc  
815 C. Glycerophospholipid synthesis and functions in *Pseudomonas*. Chem Phys Lipids.  
816 2015;190:27-42.
- 817 60. Velkov T, Thompson PE, Nation RL and Li J. Structure–activity relationships of  
818 polymyxin antibiotics. J Med Chem. 2010;53:1898-916.
- 819 61. Kim S, Thiessen PA, Bolton EE, Chen J, Fu G, Gindulyte A, et al. PubChem Substance  
820 and Compound databases. Nucleic Acids Res. 2016;44:D1202-13.
- 821 62. Pence HE and Williams A. ChemSpider: an online chemical information resource. J  
822 Chem Educ. 2010;87:1123-4.
- 823 63. Hastings J, de Matos P, Dekker A, Ennis M, Harsha B, Kale N, et al. The ChEBI  
824 reference database and ontology for biologically relevant chemistry: enhancements for  
825 2013. Nucleic Acids Res. 2013;41:D456-63.
- 826 64. King ZA, Lu J, Drager A, Miller P, Federowicz S, Lerman JA, et al. BiGG Models: A  
827 platform for integrating, standardizing and sharing genome-scale models. Nucleic  
828 Acids Res. 2016;44:D515-22.
- 829 65. Jacobs MA, Alwood A, Thaipisuttikul I, Spencer D, Haugen E, Ernst S, et al.  
830 Comprehensive transposon mutant library of *Pseudomonas aeruginosa*. Proc Natl Acad  
831 Sci U S A. 2003;100:14339-44.
- 832 66. Olaitan AO, Morand S and Rolain JM. Mechanisms of polymyxin resistance: acquired  
833 and intrinsic resistance in bacteria. Front Microbiol. 2014;5:643.
- 834 67. Graham LL, Beveridge TJ and Nanninga N. Periplasmic space and the concept of the  
835 periplasm. Trends Biochem Sci. 1991;16:328-9.

- 1  
2  
3  
4  
5  
6  
7  
8  
9  
10  
11  
12  
13  
14  
15  
16  
17  
18  
19  
20  
21  
22  
23  
24  
25  
26  
27  
28  
29  
30  
31  
32  
33  
34  
35  
36  
37  
38  
39  
40  
41  
42  
43  
44  
45  
46  
47  
48  
49  
50  
51  
52  
53  
54  
55  
56  
57  
58  
59  
60  
61  
62  
63  
64  
65
- 836 68. Silhavy TJ, Kahne D and Walker S. The bacterial cell envelope. Cold Spring Harb  
837 Perspect Biol. 2010;2:a000414.
- 838 69. Han M, Shen HH, Zhu Y, Roberts KD, Le Brun AP, Moskowitz SM, et al. Deciphering  
839 the mechanisms of polymyxin resistance in *Pseudomonas aeruginosa*: A systems  
840 pharmacology and neutron reflectometry approach. In: *Solutions for Drug-Resistant*  
841 *Infections (SDRI) 2017* Brisbane, Australia, 3-5, April 2017, p.P23. SDRI 2017.
- 842 70. Maifiah MH, Cheah SE, Johnson MD, Han ML, Boyce JD, Thamlikitkul V, et al.  
843 Global metabolic analyses identify key differences in metabolite levels between  
844 polymyxin-susceptible and polymyxin-resistant *Acinetobacter baumannii*. *Sci Rep.*  
845 2016;6:22287.
- 846 71. Henry R, Crane B, Powell D, Deveson Lucas D, Li Z, Aranda J, et al. The  
847 transcriptomic response of *Acinetobacter baumannii* to colistin and doripenem alone  
848 and in combination in an *in vitro* pharmacokinetics/pharmacodynamics model. *J*  
849 *Antimicrob Chemother.* 2015;70:1303-13.
- 850 72. Abdul Rahim N, Cheah S, Zhu Y, Johnson M, Boyce J, Yu H, et al. Integrative multi-  
851 omics network analysis of the synergistic killing of polymyxin B and chloramphenicol  
852 combination against an NDM-producing *Klebsiella pneumoniae* isolate. In: *2016*  
853 *European Congress of Clinical Microbiology and Infectious Diseases (ECCMID)*  
854 *Amsterdam, Netherland, 2016*, p.EV0651. ESCMID.
- 855 73. Machado D and Herrgard M. Systematic evaluation of methods for integration of  
856 transcriptomic data into constraint-based models of metabolism. *PLoS Comput Biol.*  
857 2014;10:e1003580.

- 1  
2  
3  
4  
5  
6  
7  
8  
9  
10  
11  
12  
13  
14  
15  
16  
17  
18  
19  
20  
21  
22  
23  
24  
25  
26  
27  
28  
29  
30  
31  
32  
33  
34  
35  
36  
37  
38  
39  
40  
41  
42  
43  
44  
45  
46  
47  
48  
49  
50  
51  
52  
53  
54  
55  
56  
57  
58  
59  
60  
61  
62  
63  
64  
65
- 858 74. Colijn C, Brandes A, Zucker J, Lun DS, Weiner B, Farhat MR, et al. Interpreting  
859 expression data with metabolic flux models: predicting *Mycobacterium tuberculosis*  
860 mycolic acid production. PLoS Comput Biol. 2009;5:e1000489.
- 861 75. Blazier AS and Papin JA. Integration of expression data in genome-scale metabolic  
862 network reconstructions. Front Physiol. 2012;3:299.
- 863 76. Kohanski MA, Dwyer DJ, Hayete B, Lawrence CA and Collins JJ. A common  
864 mechanism of cellular death induced by bactericidal antibiotics. Cell. 2007;130:797-  
865 810.
- 866 77. Johnson L, Mulcahy H, Kanevets U, Shi Y and Lewenza S. Surface-localized  
867 spermidine protects the *Pseudomonas aeruginosa* outer membrane from antibiotic  
868 treatment and oxidative stress. J Bacteriol. 2012;194:813-26.
- 869 78. Fernandez L, Jenssen H, Bains M, Wiegand I, Gooderham WJ and Hancock RE. The  
870 two-component system CprRS senses cationic peptides and triggers adaptive resistance  
871 in *Pseudomonas aeruginosa* independently of ParRS. Antimicrob Agents Chemother.  
872 2012;56:6212-22.
- 873 79. Barrow K and Kwon DH. Alterations in two-component regulatory systems of *phoPQ*  
874 and *pmrAB* are associated with polymyxin B resistance in clinical isolates of  
875 *Pseudomonas aeruginosa*. Antimicrob Agents Chemother. 2009;53:5150-4.
- 876 80. Owusu-Anim D and Kwon DH. Differential role of two-component regulatory systems  
877 (*phoPQ* and *pmrAB*) in polymyxin B susceptibility of *Pseudomonas aeruginosa*. Adv  
878 Microbiol. 2012;2:31-6.
- 879 81. Moskowitz SM, Ernst RK and Miller SI. PmrAB, a two-component regulatory system  
880 of *Pseudomonas aeruginosa* that modulates resistance to cationic antimicrobial  
881 peptides and addition of aminoarabinose to lipid A. J Bacteriol. 2004;186:575-9.



- 1  
2  
3  
4  
5  
6  
7  
8  
9  
10  
11  
12  
13  
14  
15  
16  
17  
18  
19  
20  
21  
22  
23  
24  
25  
26  
27  
28  
29  
30  
31  
32  
33  
34  
35  
36  
37  
38  
39  
40  
41  
42  
43  
44  
45  
46  
47  
48  
49  
50  
51  
52  
53  
54  
55  
56  
57  
58  
59  
60  
61  
62  
63  
64  
65
- 882 82. Gutu AD, Sgambati N, Strasbourger P, Brannon MK, Jacobs MA, Haugen E, et al.  
883 Polymyxin resistance of *Pseudomonas aeruginosa* *phoQ* mutants is dependent on  
884 additional two-component regulatory systems. *Antimicrob Agents Chemother.*  
885 2013;57:2204-15.
- 886 83. Winfield MD and Groisman EA. Phenotypic differences between *Salmonella* and  
887 *Escherichia coli* resulting from the disparate regulation of homologous genes. *Proc Natl*  
888 *Acad Sci U S A.* 2004;101:17162-7.
- 889 84. McPhee JB, Bains M, Winsor G, Lewenza S, Kwasnicka A, Brazas MD, et al.  
890 Contribution of the PhoP-PhoQ and PmrA-PmrB two-component regulatory systems to  
891 Mg<sup>2+</sup>-induced gene regulation in *Pseudomonas aeruginosa*. *J Bacteriol.*  
892 2006;188:3995-4006.
- 893 85. Thaipisuttikul I, Hittle LE, Chandra R, Zangari D, Dixon CL, Garrett TA, et al. A  
894 divergent *Pseudomonas aeruginosa* palmitoyltransferase essential for cystic fibrosis-  
895 specific lipid A. *Mol Microbiol.* 2014;91:158-74.
- 896 86. Fernández L, Gooderham WJ, Bains M, McPhee JB, Wiegand I and Hancock REW.  
897 Adaptive resistance to the “last hope” antibiotics polymyxin B and colistin in  
898 *Pseudomonas aeruginosa* is mediated by the novel two-component regulatory system  
899 ParR-ParS. *Antimicrobial Agents and Chemotherapy.* 2010;54:3372-82.
- 900 87. Thiele I and Palsson BO. A protocol for generating a high-quality genome-scale  
901 metabolic reconstruction. *Nat Protoc.* 2010;5:93-121.
- 902 88. Yu NY, Wagner JR, Laird MR, Melli G, Rey S, Lo R, et al. PSORTb 3.0: improved  
903 protein subcellular localization prediction with refined localization subcategories and  
904 predictive capabilities for all prokaryotes. *Bioinformatics.* 2010;26:1608-15.

- 1  
2  
3  
4  
5  
6  
7  
8  
9  
10  
11  
12  
13  
14  
15  
16  
17  
18  
19  
20  
21  
22  
23  
24  
25  
26  
27  
28  
29  
30  
31  
32  
33  
34  
35  
36  
37  
38  
39  
40  
41  
42  
43  
44  
45  
46  
47  
48  
49  
50  
51  
52  
53  
54  
55  
56  
57  
58  
59  
60  
61  
62  
63  
64  
65
- 905 89. Hucka M, Finney A, Sauro HM, Bolouri H, Doyle JC, Kitano H, et al. The systems  
906 biology markup language (SBML): a medium for representation and exchange of  
907 biochemical network models. *Bioinformatics*. 2003;19:524-31.
- 908 90. Hucka M and Finney AM: Systems Biology Markup Language (SBML) Level 2:  
909 Structures and Facilities for Model Definitions.  
910 <http://identifiers.org/combine.specifications/sbml.level-2.version-1> (2003). Accessed  
911 Oct 18 2017.
- 912 91. Rohn H, Junker A, Hartmann A, Grafahrend-Belau E, Treutler H, Klapperstuck M, et  
913 al. VANTED v2: a framework for systems biology applications. *BMC Syst Biol*.  
914 2012;6:139.
- 915 92. Schellenberger J, Que R, Fleming RM, Thiele I, Orth JD, Feist AM, et al. Quantitative  
916 prediction of cellular metabolism with constraint-based models: the COBRA Toolbox  
917 v2.0. *Nat Protoc*. 2011;6:1290-307.
- 918 93. Moskowitz SM, Brannon MK, Dasgupta N, Pier M, Sgambati N, Miller AK, et al. PmrB  
919 mutations promote polymyxin resistance of *Pseudomonas aeruginosa* isolated from  
920 colistin-treated cystic fibrosis patients. *Antimicrob Agents Chemother*. 2012;56:1019-  
921 30.
- 922 94. Saa PA and Nielsen LK. ll-ACHRB: a scalable algorithm for sampling the feasible  
923 solution space of metabolic networks. *Bioinformatics*. 2016;32:2330-7.
- 924 95. Mo ML, Palsson BO and Herrgard MJ. Connecting extracellular metabolomic  
925 measurements to intracellular flux states in yeast. *BMC Syst Biol*. 2009;3:37.
- 926 96. McCarthy DJ, Chen Y and Smyth GK. Differential expression analysis of multifactor  
927 RNA-Seq experiments with respect to biological variation. *Nucleic Acids Res*.  
928 2012;40:4288-97.

929 97. Kim PJ, Lee DY, Kim TY, Lee KH, Jeong H, Lee SY, et al. Metabolite essentiality  
1  
2 930 elucidates robustness of *Escherichia coli* metabolism. Proc Natl Acad Sci U S A.  
3  
4  
5 931 2007;104:13638-42.  
6

7  
8 932 98. Benjamini Y and Hochberg Y. Controlling the false discovery rate: A practical and  
9  
10 933 powerful approach to multiple testing. J Roy Stat Soc B Met. 1995;57:289-300.  
11

12  
13 934

14  
15  
16 935 **Figure legends**  
17

18  
19 936 **Figure 1.** The curated GPL biosynthesis in *iPAO1*. [c], intracellular metabolites; [p],  
20  
21 937 periplasmic metabolites; [e], external metabolites. Blue arrows indicate transport reactions.  
22  
23 938 Full names of metabolite classes are listed in **Additional file 27**.

24  
25  
26 939 **Figure 2.** LPS biosynthesis and modification in *iPAO1*. (A) VANTED diagram showing the  
27  
28 940 biosynthesis of different LPS molecules. (B) LPS biosynthesis pathway; lipid A and LPS are  
29  
30 941 indicated in the same colour as in (A).  
31  
32

33  
34 942 **Figure 3.** Constitutional genes, reactions and metabolites in *iPAO1*. (A) Sources of *iPAO1*  
35  
36 943 components. (B) Radar map showing the percentages of metabolites and reactions with valid  
37  
38 944 database identifiers. (C) The COG functional classification of the involved genes in iMO1056,  
39  
40 945 Opt208964 and *iPAO1*. Percentages given in the middle indicate the coverages of COG groups.  
41  
42 946 The proportions of the curated reactions (D), reaction-to-gene ratio (E) and predicted  
43  
44 947 subcellular localisations of the involved proteins (F) are shown for each pathway or COG group.  
45  
46 948 In panel D, red bars indicate the curated reactions; whereas blue bars indicate the reactions  
47  
48 949 from previous model. In panel D and E, pathways with the highest curation proportion or  
49  
50 950 reaction-to-gene ratio are highlighted in red.  
51  
52

53  
54  
55 951 **Figure 4.** Comparison of the BIOLOG result (left columns) and model prediction (right  
56  
57 952 columns). Blue indicates growth; whereas yellow indicates no growth.  
58  
59  
60  
61  
62  
63  
64  
65

953 **Figure 5.** Simulation of the impact of lipid A modifications on bacterial growth, metabolism  
 954 and OM physiochemical properties. The significant correlation ( $P<0.05$ ) of paired items is  
 955 indicated in red.

956 **Figure 6.** Polymyxin B induced metabolic perturbations. The distributions of metabolic fluxes  
 957 and metabolite turnover rates are shown in subgraphs with red indicating control and blue  
 958 indicating polymyxin B treatment.

959

## 960 **Tables and their legends**

961 **Table 1.** Components in model iMO1056, Opt208964 and iPAO1.

|                                                    | <i>iPAO1</i> | <i>iMO1056</i> | <i>Opt208964</i> |
|----------------------------------------------------|--------------|----------------|------------------|
| Genes                                              | 1,458        | 1,042          | 1,021            |
| Reactions                                          | 4,365        | 992            | 1,609            |
| Cytoplasmic metabolic reactions                    | 1,716        | 730            | 1,132            |
| Periplasmic metabolic reactions                    | 403          | 0              | 0                |
| External metabolic reactions                       | 40           | 0              | 0                |
| Transport reactions                                | 960          | 150            | 253              |
| Transport across IM                                | 519          | 0              | 0                |
| Transport across OM                                | 441          | 0              | 0                |
| Transport from cytoplasm to extracellular<br>space | 0            | 150            | 253              |
| Boundary reactions                                 | 352          | 112            | 223              |

|             |                                    |       |                |       |
|-------------|------------------------------------|-------|----------------|-------|
|             | Reactions without associated genes | 628   | 159            | 374   |
|             | Sink reactions                     | 0     | 0              | 1     |
| Metabolites |                                    | 3,022 | 858            | 1,344 |
|             | Cytosol                            | 1,519 | 746            | 1,121 |
|             | Periplasm                          | 698   | 0              | 0     |
|             | Extracellular space                | 805   | 112            | 223   |
| Pathways    |                                    | 109   | - <sup>a</sup> | 117   |

<sup>a</sup> Pathway information is not available in iMO1056 from the Model SEED database.

**Table 2.** Lipid A composition (%) in the outer leaflet of the OM in PAO1 [14].

| Lipid A species                | Control   | Polymyxin B treated |
|--------------------------------|-----------|---------------------|
| Hexa-lipid A                   | 42.5±0.46 | 11.7±1.13           |
| Penta-lipid A                  | 57.5±0.46 | 67.7±3.16           |
| L-Aminoarabinosylated hexa-LA  | 0         | 1.24±0.31           |
| L-Aminoarabinosylated penta-LA | 0         | 19.4±3.44           |
| Total                          | 100       | 100                 |

**Table 3.** Specific growth rate, significantly altered major exchange fluxes (>1 mmol·gDW·h<sup>-1</sup>), respiration quotient and the fluxes through F<sub>0</sub>F<sub>1</sub>-ATPase calculated using the RNA-Seq data [48] as flux constraints.

| Exchange flux<br>(mmol·gDW·h <sup>-1</sup> ) | Control | Polymyxin B<br>treatment | Z-score | FDR <sup>a</sup> |
|----------------------------------------------|---------|--------------------------|---------|------------------|
|----------------------------------------------|---------|--------------------------|---------|------------------|

|    |                                         |             |             |          |      |
|----|-----------------------------------------|-------------|-------------|----------|------|
| 1  | Specific growth rate (h <sup>-1</sup> ) | 0.82±0.00   | 0.67±0.00   | 10,201.3 | 0.00 |
| 2  |                                         |             |             |          |      |
| 3  | H <sub>2</sub> O                        | 46.9±21.8   | 53.0±19.0   | 20.37    | 0.00 |
| 4  |                                         |             |             |          |      |
| 5  | O <sub>2</sub>                          | -106.0±23.0 | -113.4±19.8 | 24.30    | 0.00 |
| 6  |                                         |             |             |          |      |
| 7  |                                         |             |             |          |      |
| 8  | CO <sub>2</sub>                         | 109.2±22.6  | 115.8±19.3  | 22.62    | 0.00 |
| 9  |                                         |             |             |          |      |
| 10 |                                         |             |             |          |      |
| 11 | NH <sub>4</sub> <sup>+</sup>            | 36.6±9.29   | 38.0±8.77   | 10.94    | 0.00 |
| 12 |                                         |             |             |          |      |
| 13 |                                         |             |             |          |      |
| 14 | Glycine                                 | 2.15±4.76   | 1.92±4.46   | 3.05     | 0.00 |
| 15 |                                         |             |             |          |      |
| 16 |                                         |             |             |          |      |
| 17 | L-Alanine                               | 1.21±5.01   | -0.52±2.20  | 31.77    | 0.00 |
| 18 |                                         |             |             |          |      |
| 19 |                                         |             |             |          |      |
| 20 | Succinate                               | 2.08±4.19   | 2.52±4.42   | 7.27     | 0.00 |
| 21 |                                         |             |             |          |      |
| 22 |                                         |             |             |          |      |
| 23 | H <sup>+</sup>                          | -41.5±14.1  | -40.4±11.9  | 6.44     | 0.00 |
| 24 |                                         |             |             |          |      |
| 25 |                                         |             |             |          |      |
| 26 | Methanethiol                            | 1.53±0.82   | 1.34±1.11   | 12.62    | 0.00 |
| 27 |                                         |             |             |          |      |
| 28 |                                         |             |             |          |      |
| 29 | H <sub>2</sub> S                        | 1.66±1.74   | 1.41±2.18   | 9.29     | 0.00 |
| 30 |                                         |             |             |          |      |
| 31 |                                         |             |             |          |      |
| 32 | Respiration Quotient (RQ)               | 1.03±0.10   | 1.02±0.10   | 7.63     | 0.00 |
| 33 |                                         |             |             |          |      |
| 34 |                                         |             |             |          |      |
| 35 | ATPase (mmol·gDW·h <sup>-1</sup> )      | -188.6±52.4 | -167.6±48.4 | 29.62    | 0.00 |
| 36 |                                         |             |             |          |      |
| 37 |                                         |             |             |          |      |

<sup>a</sup> FDR was calculated using the Benjamini-Hochberg method [98].

968

969

1  
2  
3  
4  
5  
6  
7  
8  
9  
10  
11  
12  
13  
14  
15  
16  
17  
18  
19  
20  
21  
22  
23  
24  
25  
26  
27  
28  
29  
30  
31  
32  
33  
34  
35  
36  
37  
38  
39  
40  
41  
42  
43  
44  
45  
46  
47  
48  
49  
50  
51  
52  
53  
54  
55  
56  
57  
58  
59  
60  
61  
62  
63  
64  
65

Figure 1

[Click here to download Figure 1.eps](#)

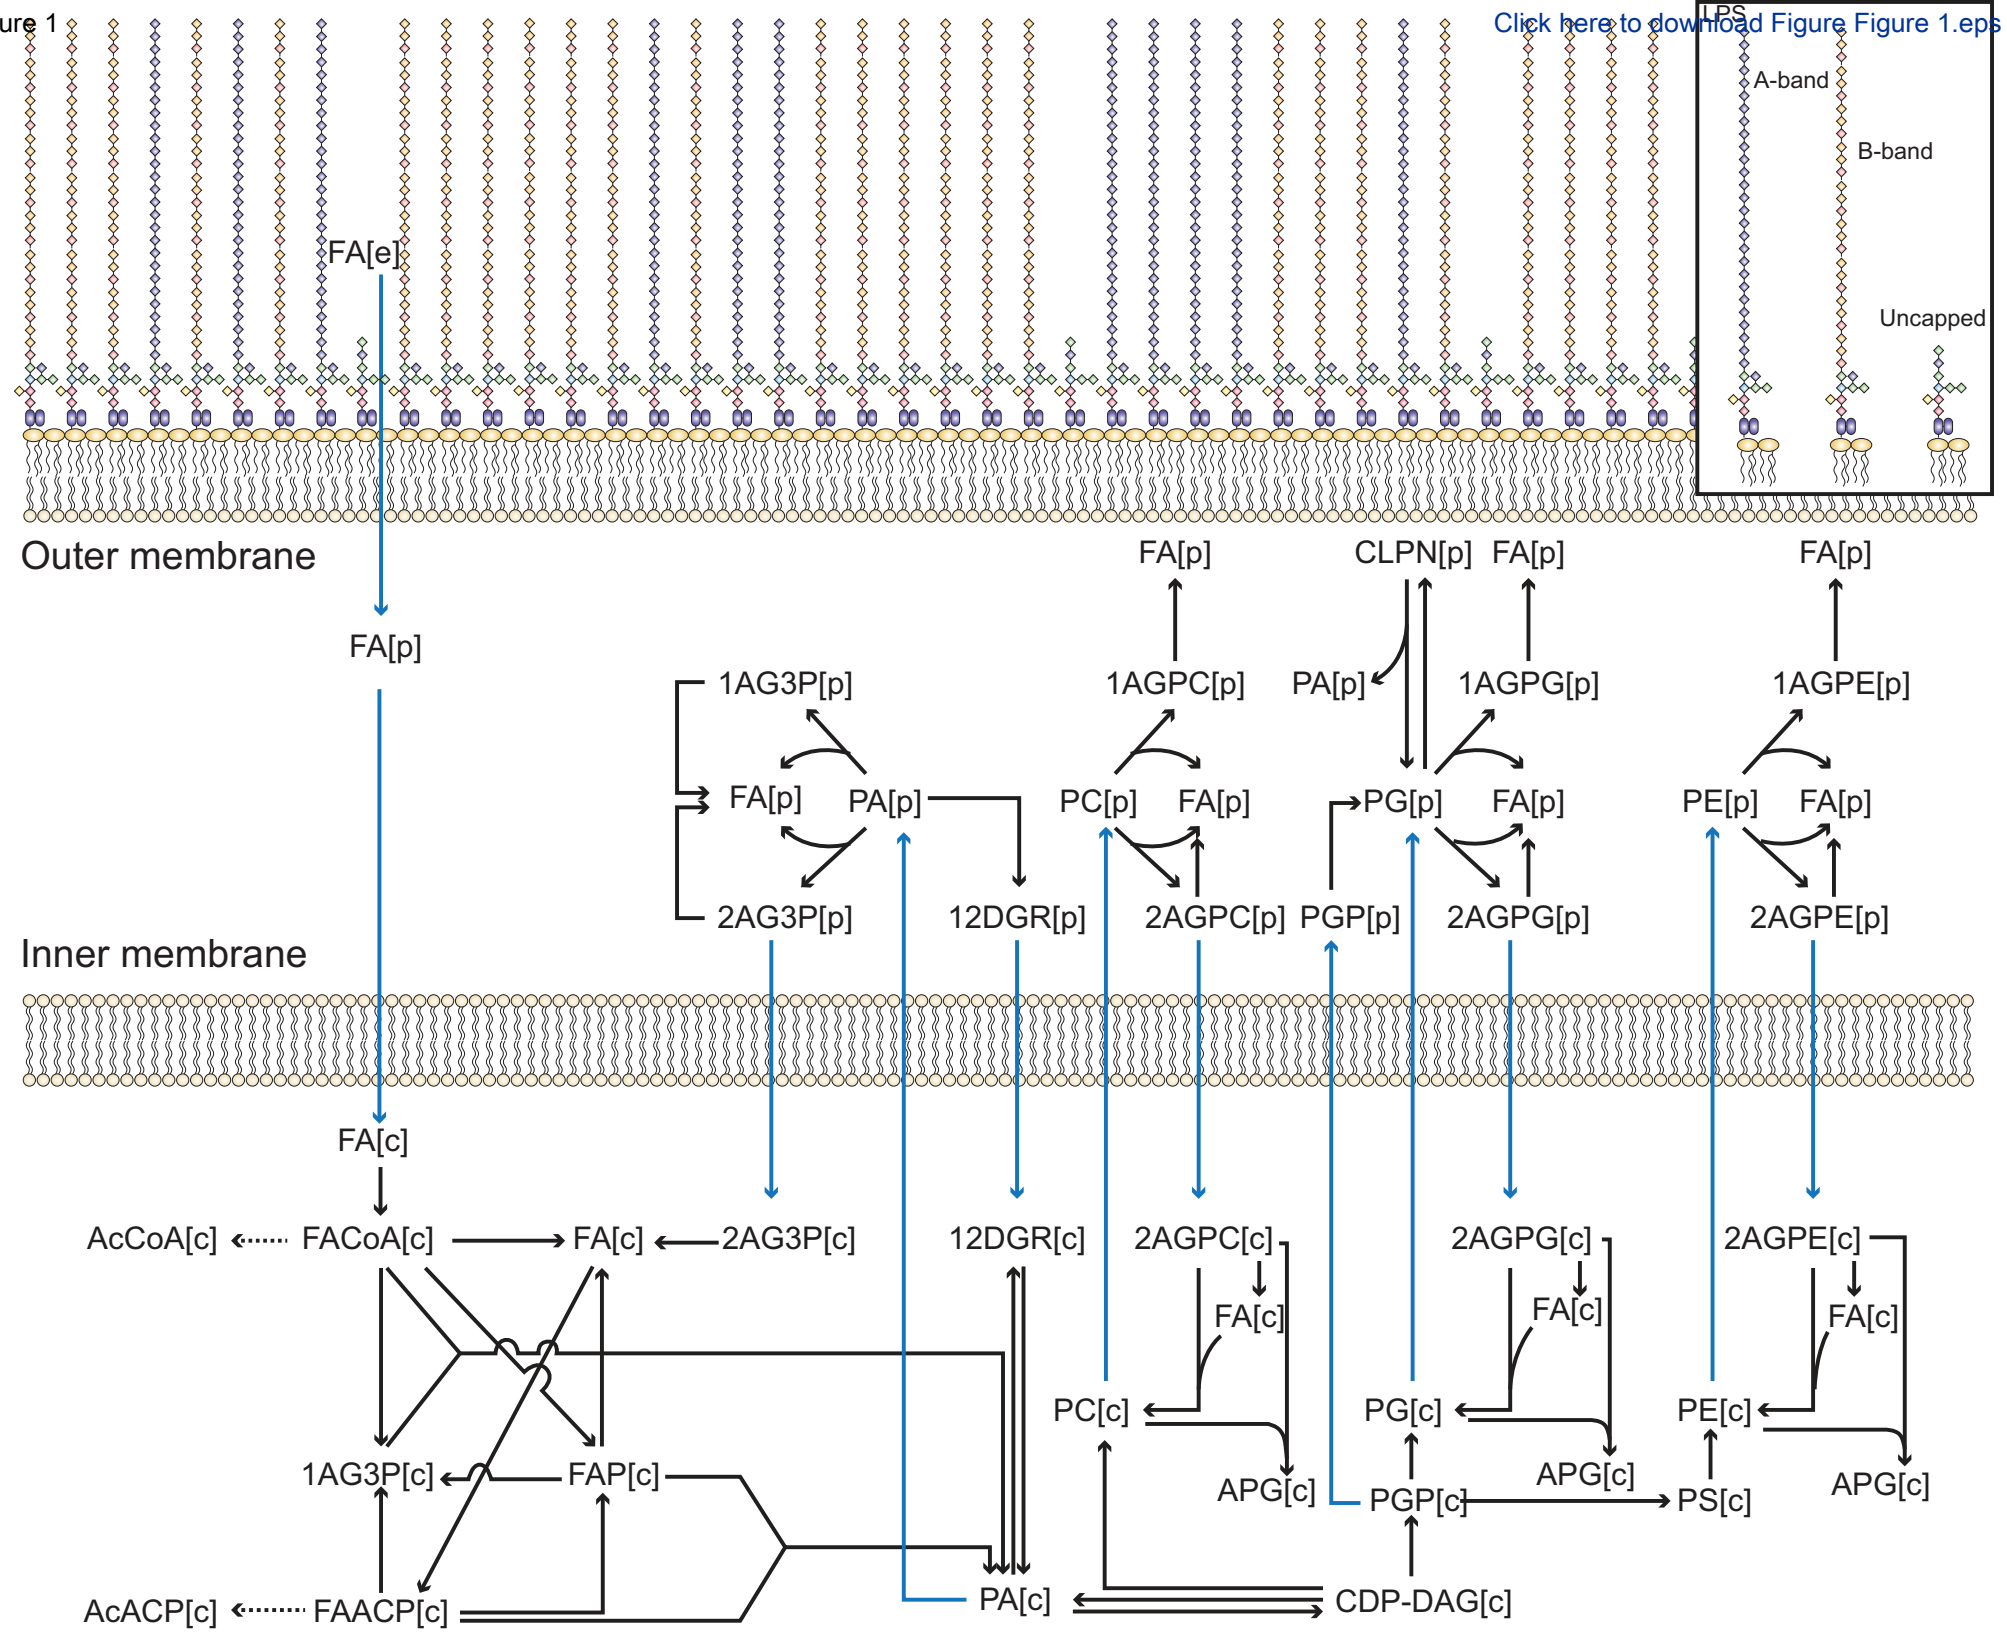

Figure 2

[Click here to download Figure Figure 2.pdf](#)

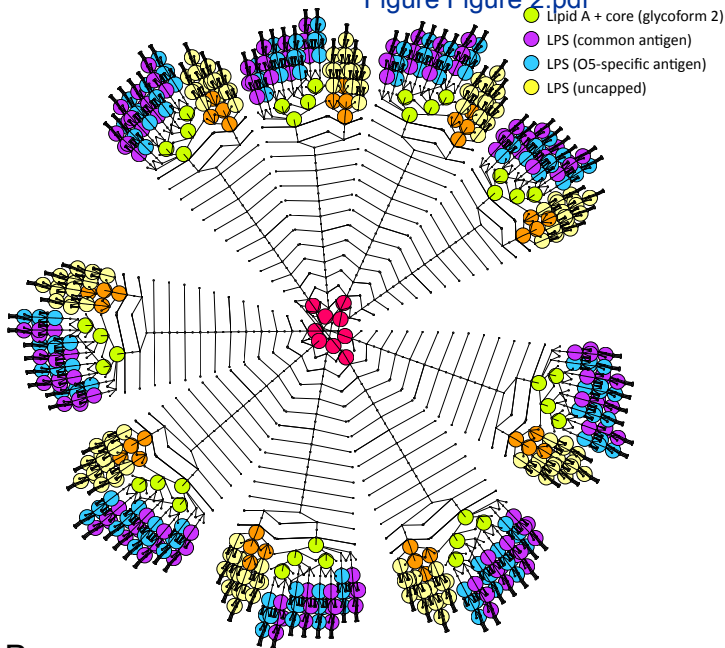

B

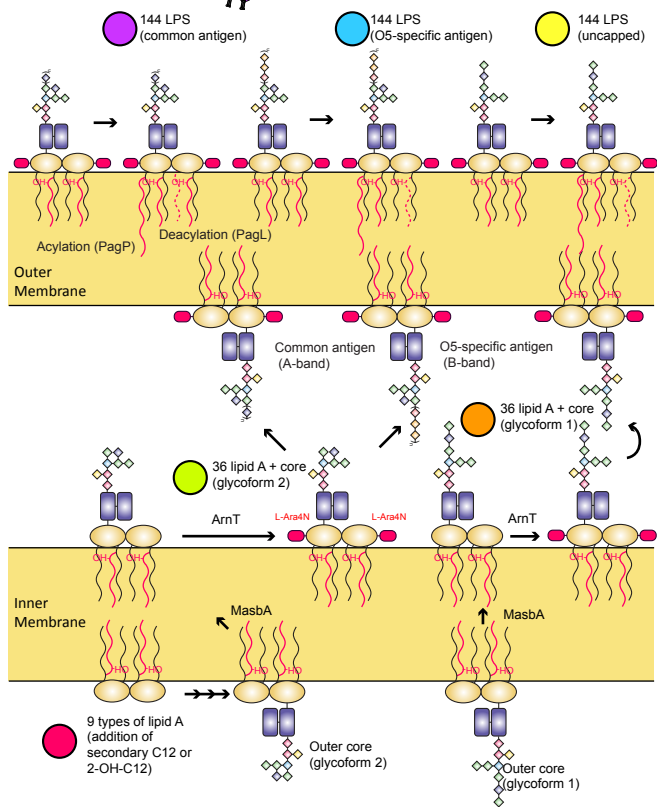



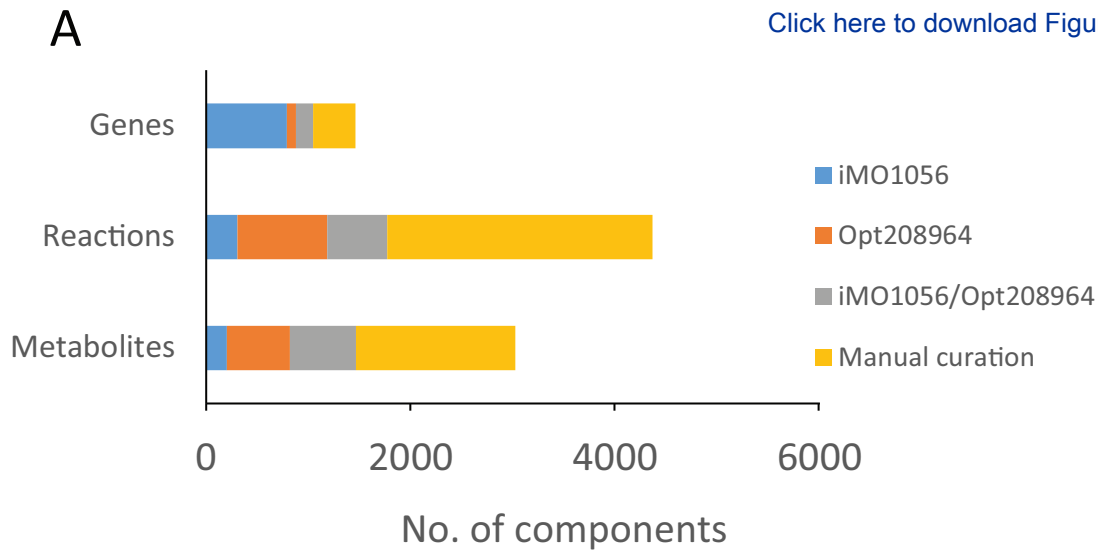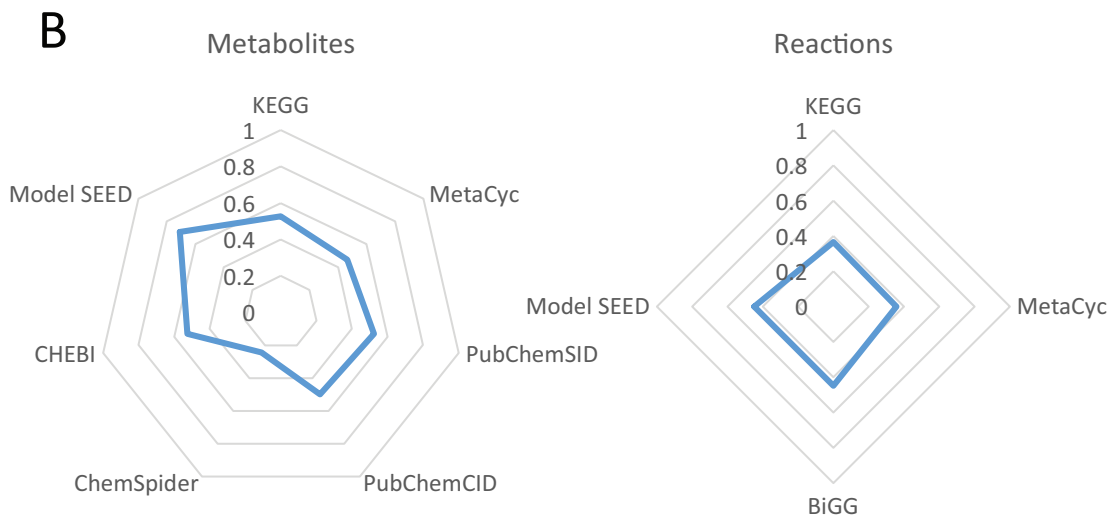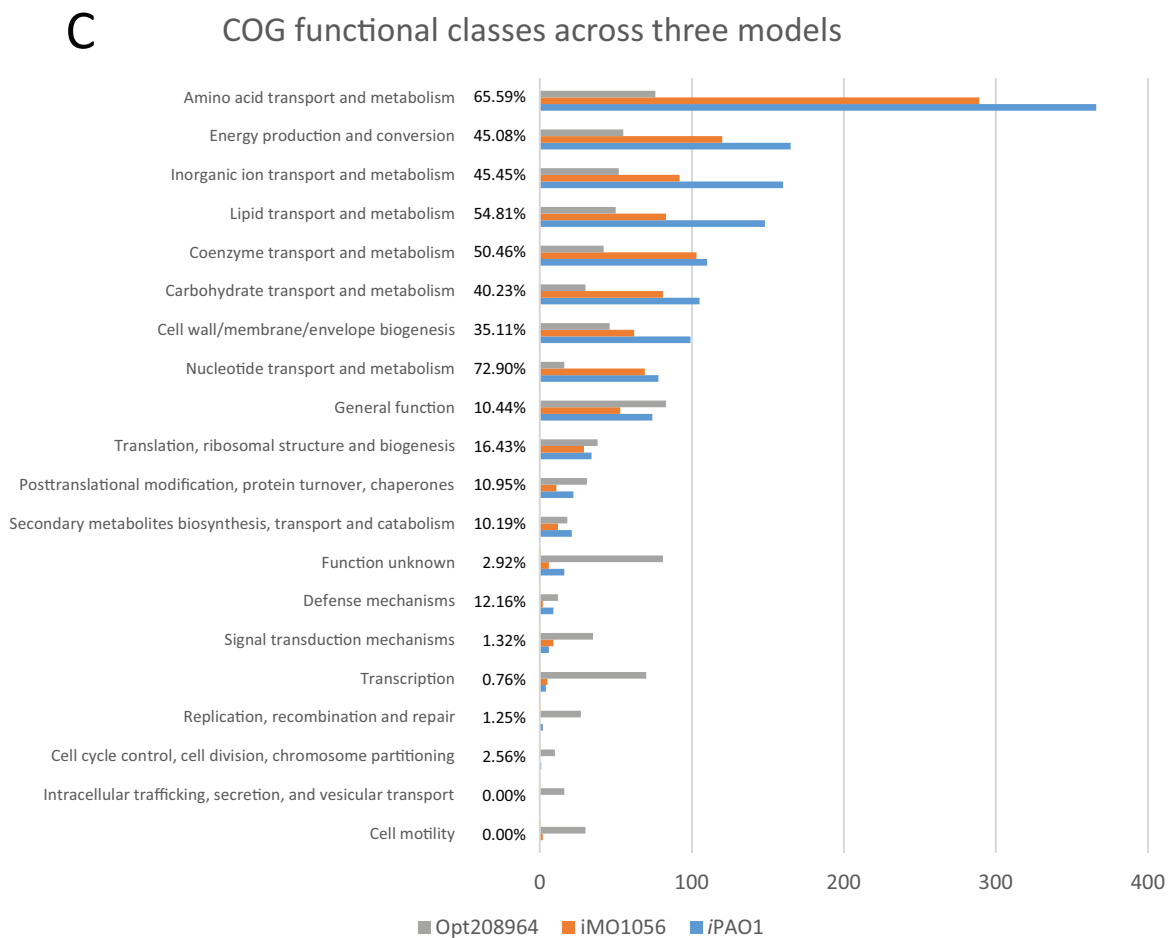

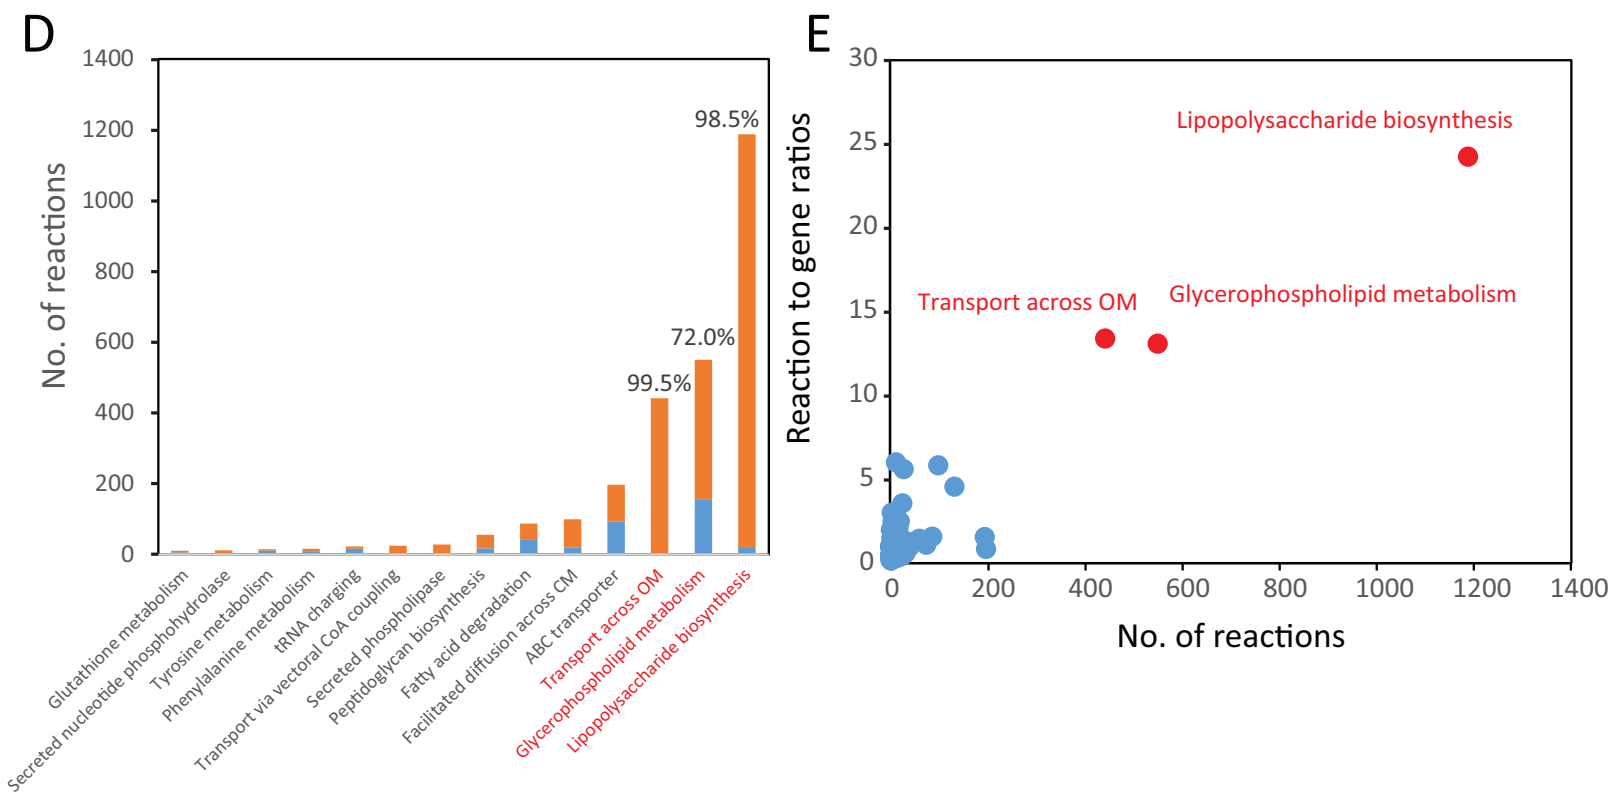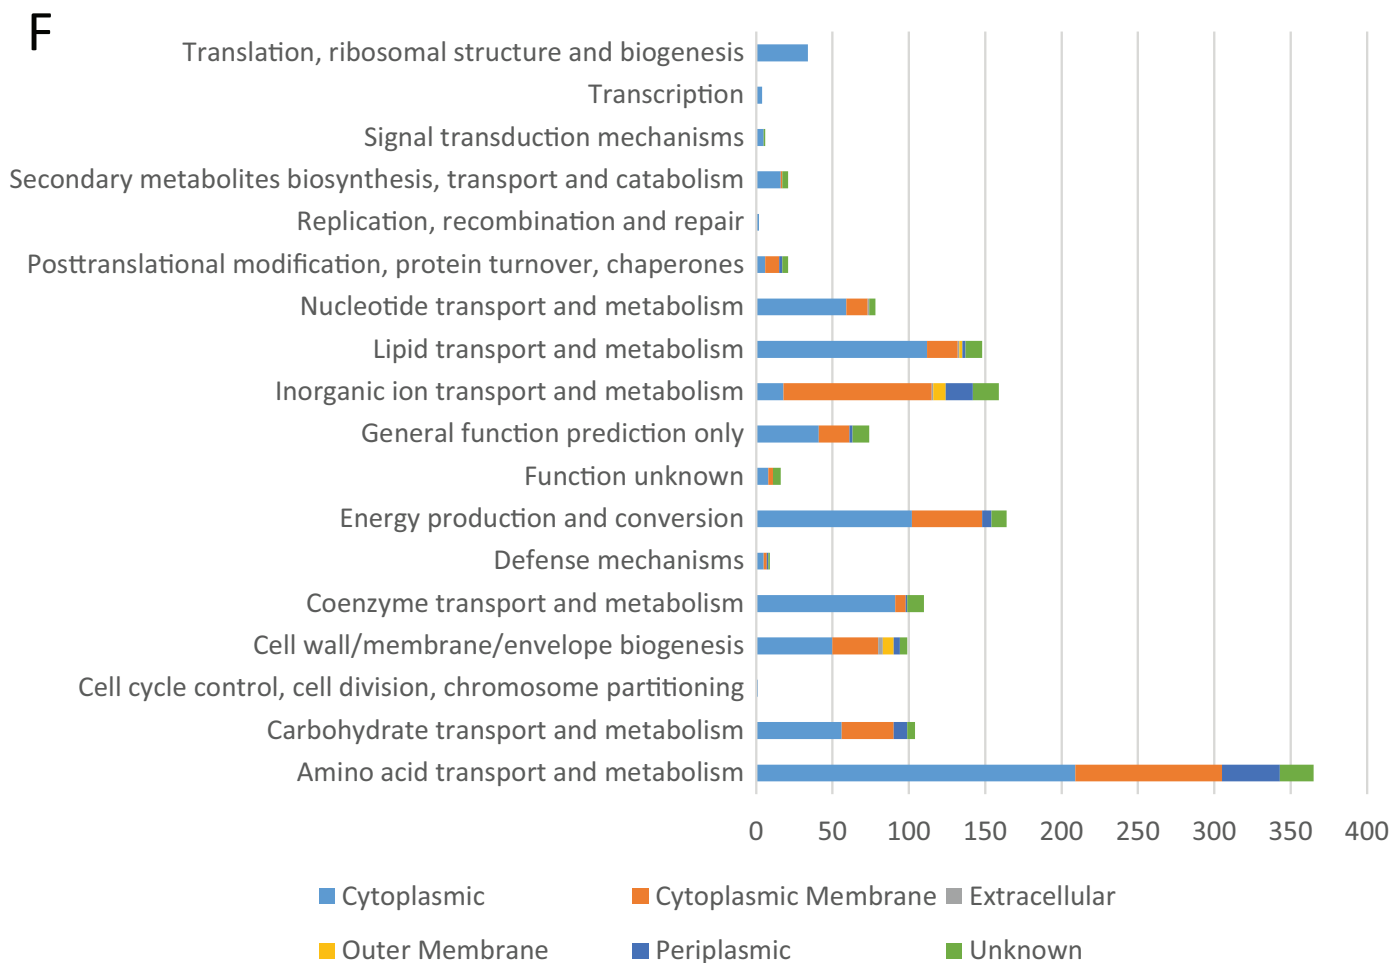

| PM1 (Carbon)                      | Biolog /PAO1 | PM2 (Carbon) | Biolog /PAO1                          | PM3 (Nitrogen) | Biolog /PAO1 |                             |   |   |
|-----------------------------------|--------------|--------------|---------------------------------------|----------------|--------------|-----------------------------|---|---|
| L-Arabinose                       | x            | x            | Chondroitin Sulfate C                 | x              | x            | Ammonia                     | v | v |
| N-Acetyl-D-Glucosamine            | v            | v            | a-Cyclodextrin                        | x              | x            | Nitrite                     | v | v |
| D-Saccharic Acid                  | x            | x            | b-Cyclodextrin                        | x              | x            | Sodium Nitrate              | v | v |
| Succinic Acid                     | v            | v            | g-Cyclodextrin                        | x              | x            | Urea                        | v | v |
| D-Galactose                       | x            | x            | Dextrin                               | x              | x            | Biuret                      | x | x |
| L-Aspartic Acid                   | v            | v            | Gelatin                               | x              | x            | L-Alanine                   | v | v |
| L-Proline                         | v            | v            | Glycogen                              | x              | x            | L-Arginine                  | v | v |
| D-Alanine                         | v            | v            | Inulin                                | x              | x            | L-Asparagine                | v | v |
| D-Trehalose                       | x            | v            | Laminarin                             | x              | x            | L-Aspartic Acid             | v | v |
| D-Mannose                         | x            | x            | Mannan                                | x              | x            | L-Cysteine                  | v | v |
| Dulcitol                          | x            | x            | Pectin                                | x              | x            | L-Glutamic Acid             | v | v |
| D-Serine                          | x            | v            | N-Acetyl-D-Galactosamine              | x              | x            | L-Glutamine                 | v | v |
| D-Sorbitol                        | x            | x            | N-Acetyl-Neuraminic Acid              | x              | x            | Glycine                     | v | v |
| Glycerol                          | v            | v            | b-D-Allose                            | x              | x            | L-Histidine                 | v | v |
| L-Fucose                          | x            | x            | D-Amygdalin                           | x              | x            | L-Isoleucine                | v | v |
| D-Glucuronic Acid                 | x            | x            | D-Arabinose                           | x              | x            | L-Leucine                   | v | v |
| D-Gluconic Acid                   | v            | v            | D-Arabitol                            | x              | x            | L-Lysine                    | v | v |
| D,L-a-Glycerol Phosphate          | x            | v            | L-Arabitol                            | x              | x            | L-Methionine                | v | v |
| D-Xylose                          | x            | x            | Arbutin                               | x              | x            | L-Phenylalanine             | v | v |
| L-Lactic Acid                     | v            | v            | 2-Deoxy-D-Ribose                      | x              | x            | L-Proline                   | v | v |
| Formic Acid                       | v            | v            | i-Erythritol                          | x              | x            | L-Serine                    | v | v |
| D-Mannitol                        | v            | v            | D-Fucose                              | x              | x            | L-Threonine                 | v | v |
| L-Glutamic Acid                   | v            | v            | 3-0-b-D-Galacto-pyranosyl-D-Arabinose | x              | x            | L-Tryptophan                | v | v |
| D-Glucose-6-Phosphate             | x            | v            | Gentobiose                            | x              | x            | L-Tyrosine                  | v | v |
| D-Galactonic Acid-g-Lactone       | x            | x            | L-Glucose                             | x              | x            | L-Valine                    | v | v |
| D,L-Malic Acid                    | v            | v            | Lactitol                              | x              | x            | D-Alanine                   | v | v |
| D-Ribose                          | v            | v            | D-Melezitose                          | x              | x            | D-Asparagine                | v | v |
| Tween 20                          | v            | x            | Maltitol                              | x              | x            | D-Aspartic Acid             | x | x |
| L-Rhamnose                        | x            | x            | a-Methyl-D-Galactoside                | x              | x            | D-Glutamic Acid             | v | v |
| D-Fructose                        | v            | v            | b-Methyl-D-Galactoside                | x              | x            | D-Lysine                    | v | v |
| Acetic Acid                       | v            | v            | 3-Methyl Glucose                      | x              | x            | D-Serine                    | v | v |
| D-(+)-Glucose                     | v            | v            | b-Methyl-D-Glucuronic Acid            | x              | x            | D-Valine                    | v | v |
| Maltose                           | x            | x            | a-Methyl-D-Mannoside                  | x              | x            | L-Citrulline                | v | v |
| D-Melibiose                       | x            | x            | b-Methyl-D-Xyloside                   | x              | x            | L-Homoserine                | x | x |
| Thymidine                         | x            | x            | Palatinose                            | x              | x            | L-Ornithine                 | v | v |
| L-Asparagine                      | v            | v            | D-Raffinose                           | x              | x            | N-Acetyl-L-Glutamic Acid    | v | v |
| D-Aspartic Acid                   | x            | x            | Salicin                               | x              | x            | N-Phthaloyl-L-Glutamic Acid | v | x |
| D-Glucosaminic Acid               | x            | x            | Sedoheptulosan                        | x              | x            | L-Pyrogutamic Acid          | v | v |
| 1,2-Propanediol                   | v            | v            | L-Sorbose                             | x              | x            | Hydroxylamine               | x | v |
| Tween 40                          | v            | x            | Stachyose                             | x              | x            | Methylamine                 | x | x |
| a-Keto-Gutaric Acid               | v            | v            | D-Tagatose                            | x              | x            | N-Amylamine                 | x | x |
| a-Ketobutyric Acid                | v            | v            | Turanose                              | x              | x            | N-Butylamine                | x | x |
| a-Methyl-D-Galactoside            | x            | x            | Xylitol                               | x              | x            | Ethylamine                  | x | x |
| a-D-Lactose                       | x            | x            | N-Acetyl-D-glucosaminitol             | x              | x            | Ethanolamine                | v | x |
| Lactulose                         | x            | x            | g-Amino Butyric Acid                  | v              | v            | Ethylenediamine             | x | x |
| Sucrose                           | x            | x            | d-Amino Valeric Acid                  | v              | v            | Putrescine                  | v | v |
| Uridine                           | x            | v            | Butyric Acid                          | v              | v            | Agmatine                    | v | v |
| L-Glutamine                       | v            | v            | Capric Acid                           | x              | v            | Histamine                   | v | v |
| m-Tartaric Acid                   | x            | x            | Caproic Acid                          | v              | v            | b-Phenylethylamine          | v | v |
| D-Glucose-1-Phosphate             | x            | v            | Citraconic Acid                       | x              | x            | Tyramine                    | v | v |
| D-Fructose-6-Phosphate            | x            | x            | Citramalic Acid                       | v              | v            | Acetamide                   | v | v |
| Tween 80                          | v            | x            | D-Glucosamine                         | x              | x            | Formamide                   | x | x |
| a-Hydroxy Glutaric Acid-g-Lactone | x            | x            | 2-Hydroxybenzoic acid                 | x              | x            | Glucuronamide               | v | v |
| D,L-a-Hydroxy-Butyric Acid        | v            | v            | 4-Hydroxy Benzoic Acid Sodium         | v              | v            | D,L-Lactamide               | v | v |
| b-Methyl-D-Glucoside              | x            | x            | b-Hydroxy Butyric Acid                | v              | v            | D-Glucosamine               | x | x |
| Adonitol                          | x            | x            | g-Hydroxy Butyric Acid                | x              | v            | D-Galactosamine             | x | x |
| Maltotriose                       | x            | x            | 2-Oxovaleric acid                     | x              | x            | D-Mannosamine               | x | x |
| 2'-Deoxy Adenosine                | x            | x            | Itaconic Acid                         | v              | v            | N-Acetyl-D-Glucosamine      | v | v |
| Adenosine                         | v            | v            | 5-Keto-D-Gluconic Acid                | x              | x            | N-Acetyl-D-Galactosamine    | v | v |
| Glycyl-L-Aspartic Acid            | x            | v            | D-Lactic Acid Methyl Ester            | x              | x            | N-Acetyl-D-Mannosamine      | x | x |
| Citric Acid                       | v            | v            | Malonic Acid                          | v              | v            | Adenine                     | v | v |
| m-Inositol                        | x            | x            | Melibionic Acid                       | x              | x            | Adenosine                   | v | v |
| D-Threonine                       | x            | x            | Oxalic Acid                           | x              | x            | Cytidine                    | v | v |
| Fumaric Acid                      | v            | v            | Oxalomalic Acid                       | x              | x            | Cytosine                    | v | v |
| Bromo Succinic Acid               | v            | x            | Quinic Acid                           | v              | v            | Guanine                     | v | v |
| Propionic Acid                    | v            | v            | D-Ribono-1,4-Lactone                  | x              | x            | Guanosine                   | v | v |
| Mucic Acid                        | x            | x            | Sebacic Acid                          | x              | x            | Thymine                     | v | v |
| Glycolic Acid                     | x            | x            | Sorbic acid                           | v              | v            | Thymidine                   | x | x |
| Glyoxylic Acid                    | x            | x            | Succinamic Acid                       | v              | v            | Uracil                      | v | v |
| D-Cellobiose                      | x            | x            | D-Tartaric Acid                       | x              | x            | Uridine                     | v | v |
| Inosine                           | v            | v            | L-Tartaric Acid                       | x              | x            | Inosine                     | v | v |
| Glycyl-L-Glutamic Acid            | x            | v            | Acetamide                             | x              | v            | Xanthine                    | v | v |
| Tricarballic Acid                 | x            | x            | L-Alaninamide                         | v              | v            | Xanthosine                  | v | v |
| L-Serine                          | v            | v            | N-Acetyl-L-Glutamic Acid              | v              | v            | Uric Acid                   | v | v |
| L-Threonine                       | x            | v            | L-Arginine                            | v              | v            | Alloxan                     | v | x |
| L-Alanine                         | v            | v            | Glycine                               | v              | v            | Allantoin                   | v | v |
| Ala-Gly                           | x            | v            | L-Histidine                           | v              | v            | Parabanic Acid              | v | x |
| Acetoacetic Acid                  | v            | v            | L-Homoserine                          | x              | v            | D,L-a-Amino-N-Butyric Acid  | x | x |
| N-Acetyl-D-Mannosamine            | x            | x            | Hydroxy-L-Proline                     | v              | v            | g-Amino Butyric Acid        | v | v |
| Mono Methyl Succinate             | v            | v            | L-Isoleucine                          | v              | v            | e-Amino-N-Caproic Acid      | x | x |
| Methyl Pyruvate                   | v            | x            | L-Leucine                             | v              | v            | D,L-a-Amino- Caprylic Acid  | x | x |
| D-Malic Acid                      | x            | x            | L-Lysine                              | x              | v            | d-Amino-N-Valeric Acid      | v | v |
| L-Malic Acid                      | v            | v            | L-Methionine                          | x              | v            | a-Amino-N-Valeric Acid      | v | x |
| Glycyl-L-Proline                  | v            | v            | L-Ornithine                           | v              | v            | Ala-Asp                     | v | v |
| p-Hydroxy Phenyl Acetic Acid      | v            | v            | L-Phenylalanine                       | x              | v            | Ala-Gln                     | v | v |
| M-Hydroxy Phenyl Acetic Acid      | x            | x            | L-Pyrogutamic Acid                    | v              | v            | Ala-Glu                     | v | v |
| Tyramine                          | v            | v            | L-Valine                              | x              | v            | Ala-Gly                     | v | v |
| D-Psicose                         | x            | x            | D,L-Carnitine                         | v              | v            | Ala-His                     | v | v |
| L-Lyxose                          | x            | x            | Sec-Butylamine                        | x              | x            | Ala-Leu                     | v | v |
| Glucuronamide                     | x            | x            | D,L-Octopamine                        | v              | v            | Ala-Thr                     | v | v |
| Pyruvic Acid                      | v            | v            | Putrescine                            | v              | v            | Gly-Asn                     | v | v |
| L-Galactonic Acid-g-Lactone       | x            | x            | Dihydroxy Acetone                     | x              | x            | Gly-Gln                     | v | v |
| D-Galacturonic Acid               | x            | x            | 2,3-Butanediol                        | v              | v            | Gly-Glu                     | v | v |
| b-Phenylethylamine                | x            | x            | Diacetyl                              | x              | x            | Gly-Met                     | x | v |
| 2-Aminoethanol                    | v            | v            | 3-Hydroxy 2-Butanone                  | x              | x            | Met-Ala                     | v | v |

Figure 5

Specific growth and turnover rates (mmol-gDW-h<sup>-1</sup>)Apparent properties of Lipid A (gDW<sup>-1</sup>)[Click here to download Figure 5.pdf](#)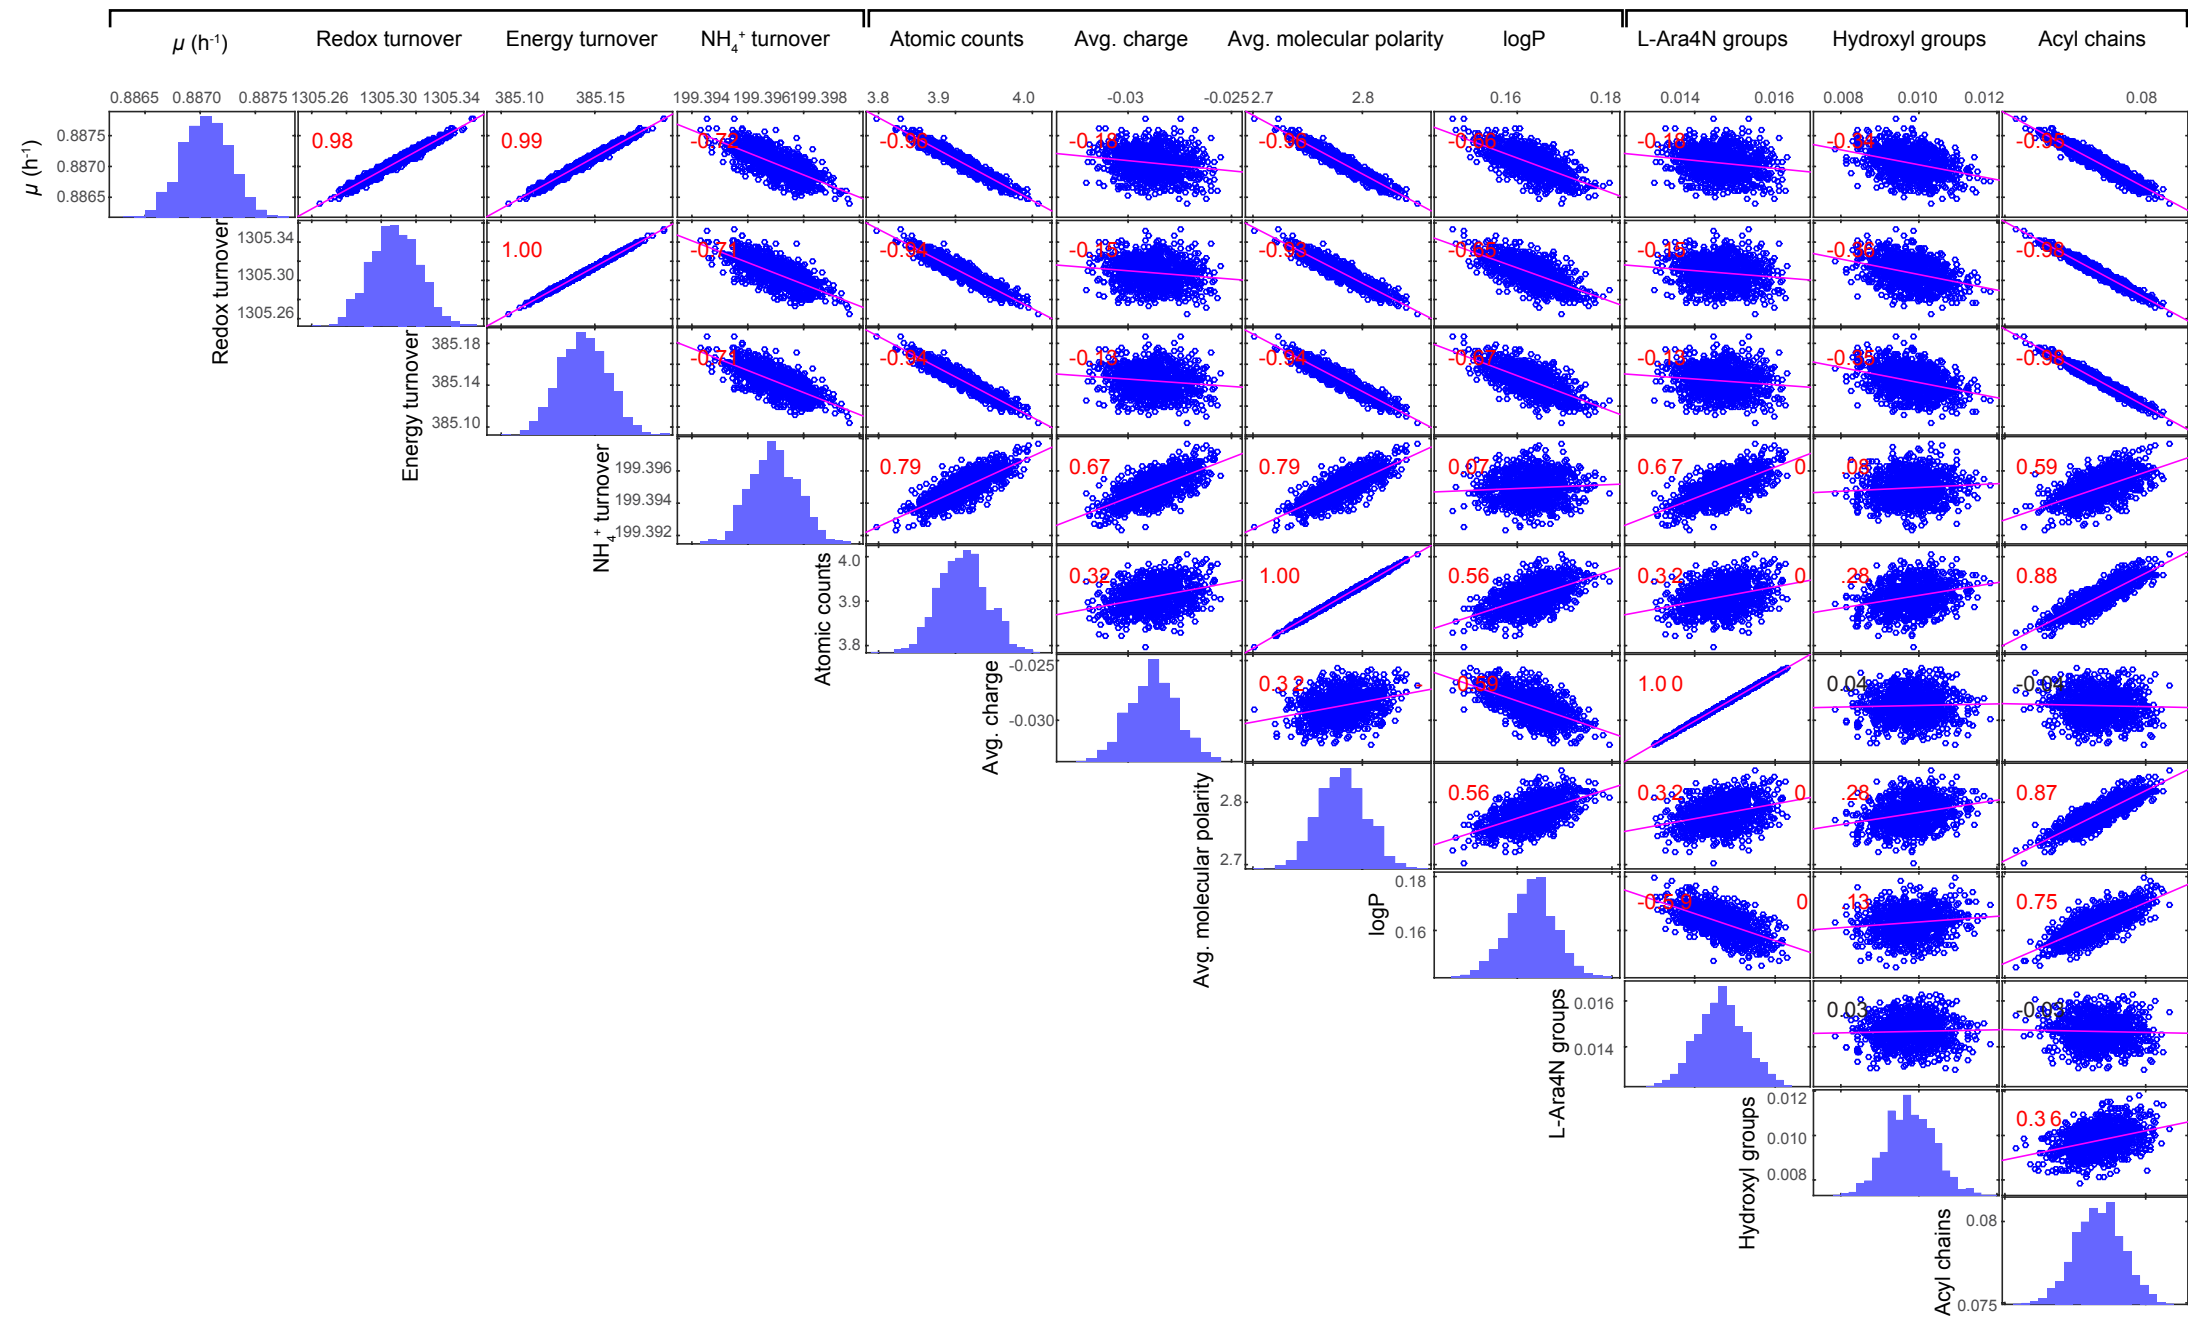

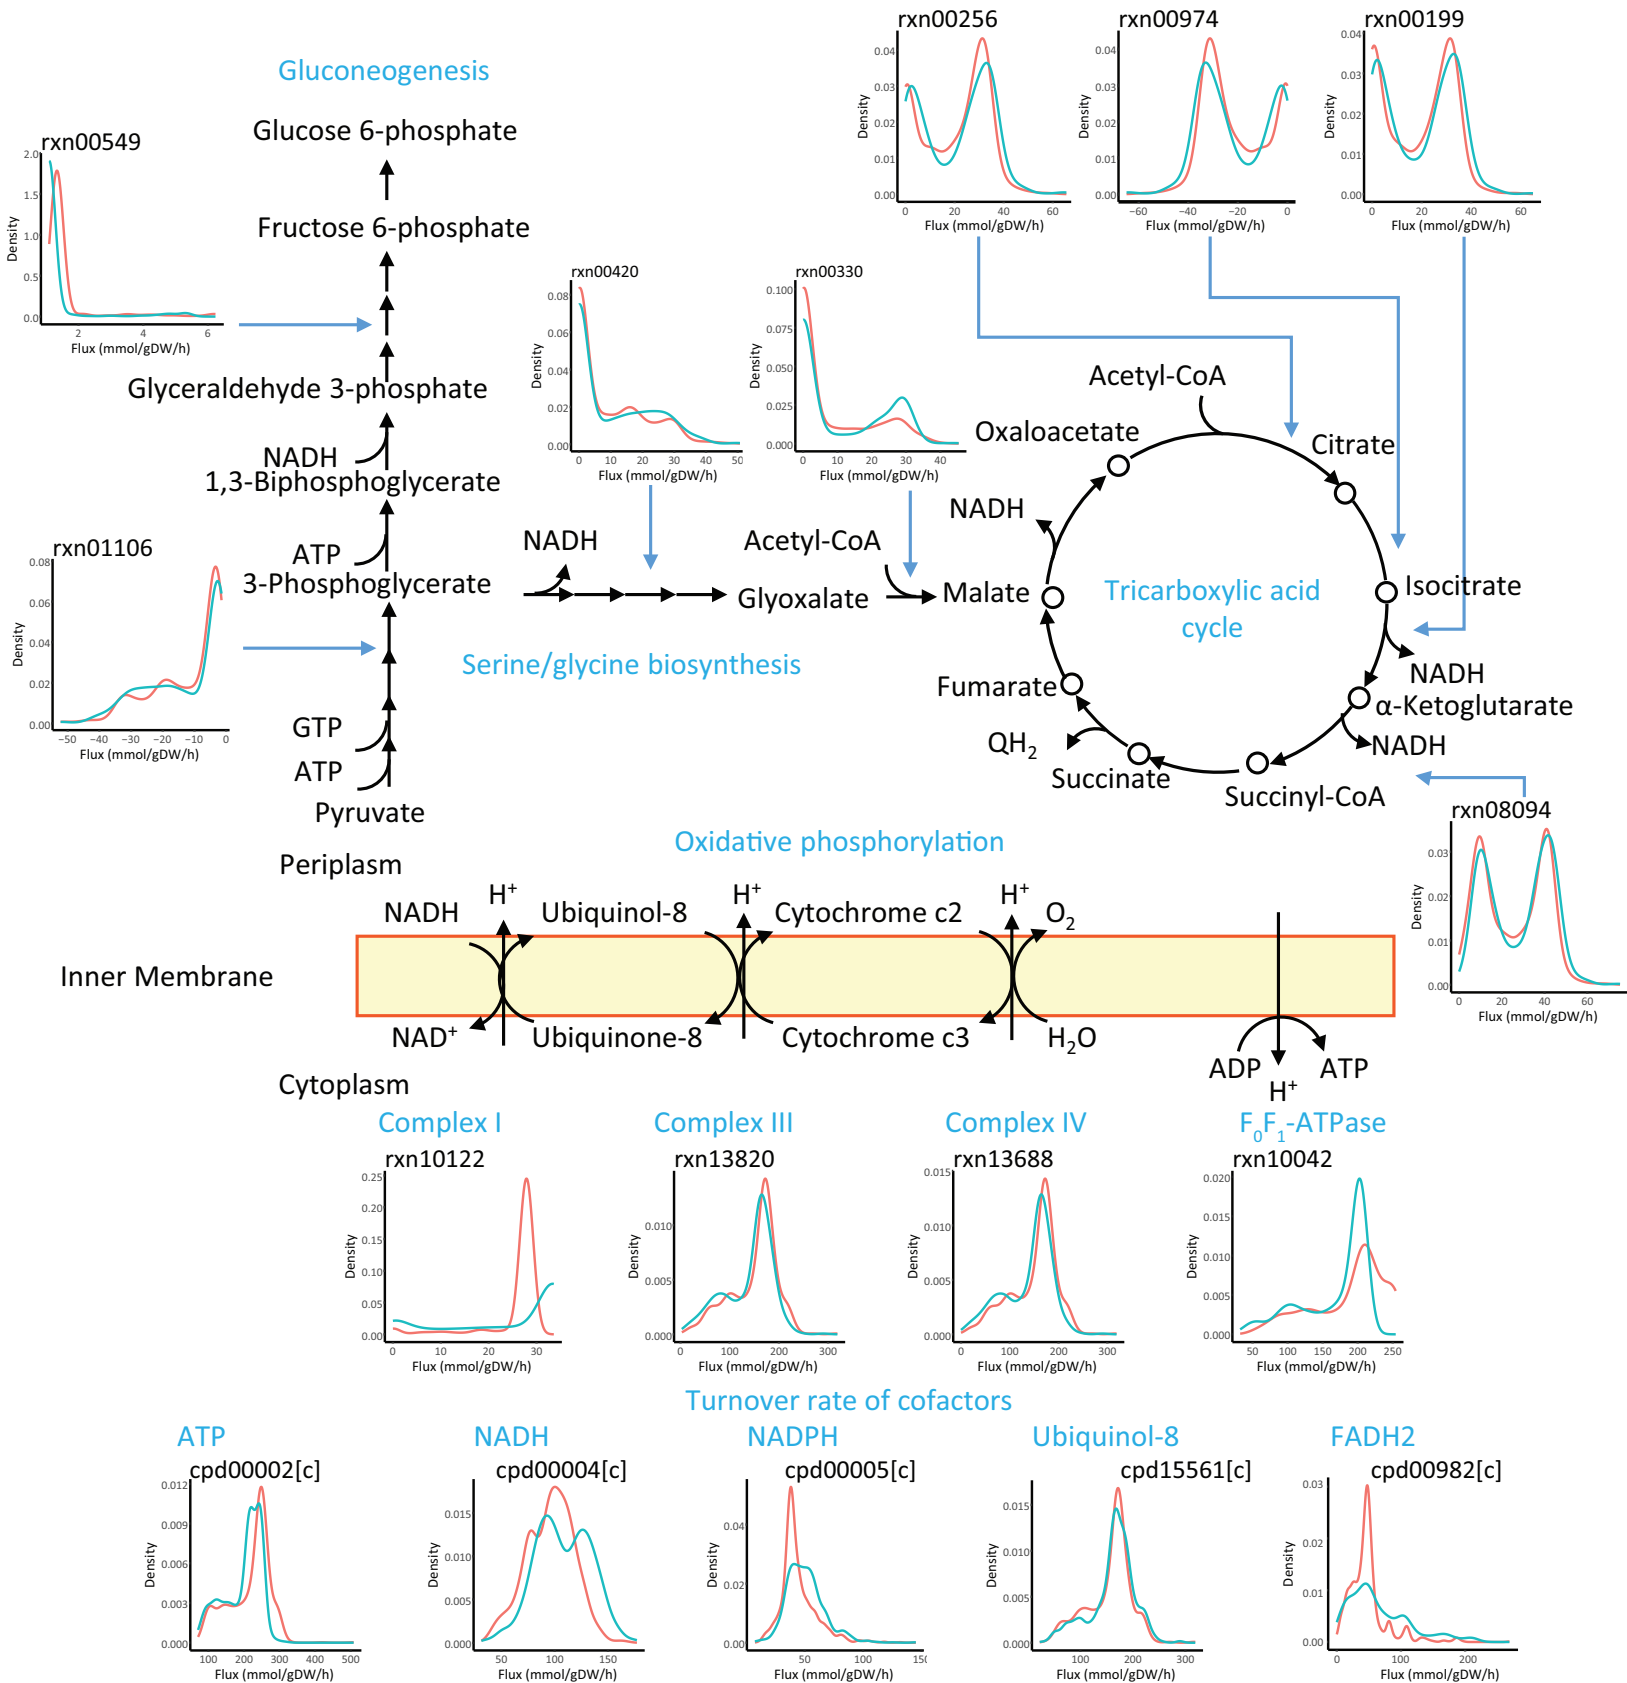



Click here to access/download  
**Supplementary Material**  
additionalFile1.docx





Click here to access/download  
**Supplementary Material**  
additionalFile2.xlsx



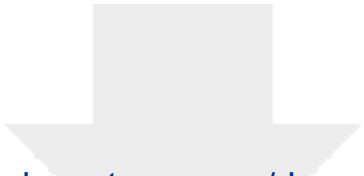

Click here to access/download  
**Supplementary Material**  
additionalFile3.xlsx







Click here to access/download  
**Supplementary Material**  
additionalFile4.xlsx



Click here to access/download  
**Supplementary Material**  
additionalFile5.xlsx



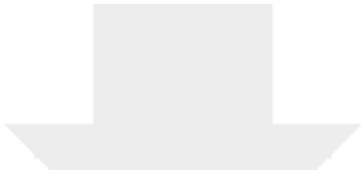

Click here to access/download  
**Supplementary Material**  
additionalFile6.xlsx



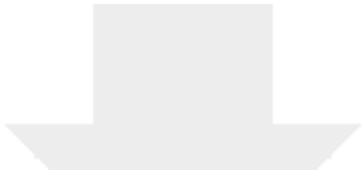

Click here to access/download  
**Supplementary Material**  
additionalFile7.xlsx



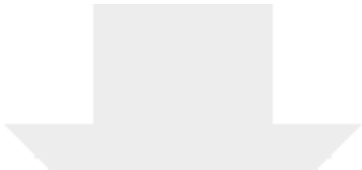

Click here to access/download  
**Supplementary Material**  
additionalFile8.xlsx





Click here to access/download  
**Supplementary Material**  
additionalFile9.xlsx



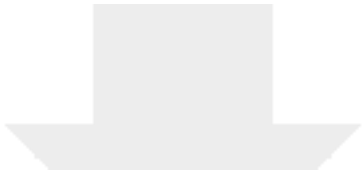

Click here to access/download  
**Supplementary Material**  
additionalFile10.xlsx



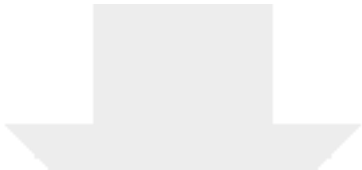

Click here to access/download  
**Supplementary Material**  
additionalFile11.xlsx





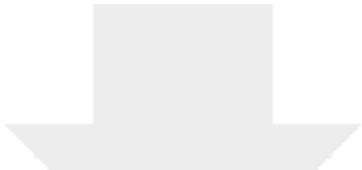

Click here to access/download  
**Supplementary Material**  
additionalFile12.xlsx





Click here to access/download  
**Supplementary Material**  
additionalFile13.xlsx



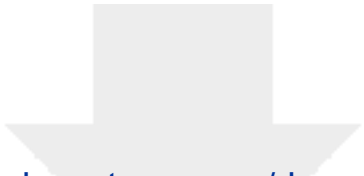

Click here to access/download  
**Supplementary Material**  
additionalFile14.xlsx



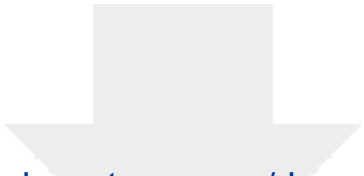

Click here to access/download  
**Supplementary Material**  
additionalFile15.xlsx



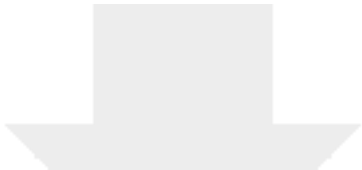

Click here to access/download  
**Supplementary Material**  
additionalFile16.xlsx



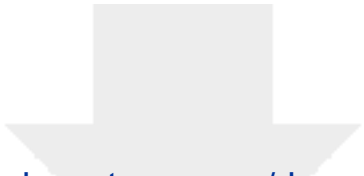

Click here to access/download  
**Supplementary Material**  
additionalFile17.xlsx





Click here to access/download  
**Supplementary Material**  
additionalFile18.xlsx





Click here to access/download  
**Supplementary Material**  
additionalFile19.xlsx





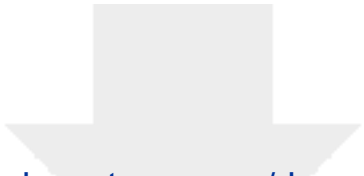

Click here to access/download  
**Supplementary Material**  
additionalFile20.xlsx



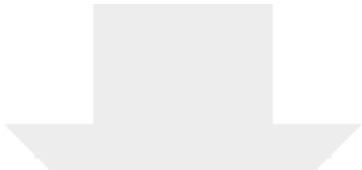

Click here to access/download  
**Supplementary Material**  
additionalFile21.xlsx



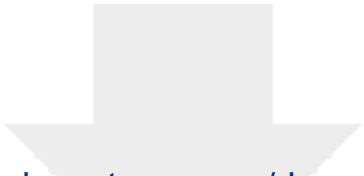

Click here to access/download  
**Supplementary Material**  
additionalFile22.xlsx





Click here to access/download  
**Supplementary Material**  
additionalFile23.xlsx



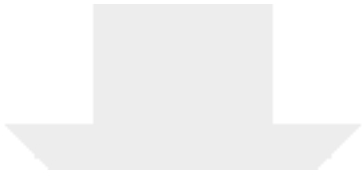

Click here to access/download  
**Supplementary Material**  
additionalFile24.xlsx



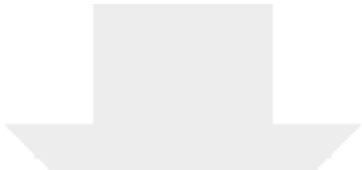

Click here to access/download  
**Supplementary Material**  
additionalFile25.xlsx





Click here to access/download  
**Supplementary Material**  
additionalFile26.xlsx



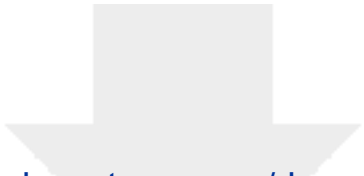

Click here to access/download  
**Supplementary Material**  
additionalFile27.xlsx





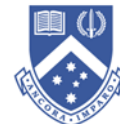

Professor Jian Li  
Head, Laboratory of Antimicrobial Systems Pharmacology  
Monash Biomedicine Discovery Institute

Dr Laurie Goodman  
Editor-in-Chief  
*GigaScience*

16 October 2017

Dear Dr Goodman,

We are pleased to submit our manuscript entitled “*Genome-scale metabolic modelling of responses to polymyxins in Pseudomonas aeruginosa*” for your consideration as an original Research Article in *GigaScience*.

Antimicrobial resistance has become one of the greatest threats to global health today. Multidrug-resistant (MDR) *P. aeruginosa* has been categorised by the World Health Organization as a “Critical” Gram-negative ‘superbug’ against which no new antibiotics will be available in the near future. Polymyxins are ‘old’ antibiotics firstly discovered in 1947, but have been abandoned since the 1970s. Over the last decade polymyxins have been revived as the last-line therapy against Gram-negative ‘superbugs’, including *P. aeruginosa*, which are resistant to all other antibiotics. However, the mechanism of their antibacterial activity remains largely unknown.

Here we report the construction of a superior genome-scale metabolic model (GSMM) *iPAO1* for *P. aeruginosa* PAO1 which represents *the largest genome-scale metabolic model thus far for any Gram-negative bacteria*. *iPAO1* provides a powerful systems pharmacology tool to elucidate the complex mode of action of antibiotics and shift the paradigm of the “one-gene, one-receptor, one-mechanism” approach. It is able to quantitatively simulate complex bacterial cellular responses in response to antibiotic treatments.

To date, there are four curated GSMMs for *P. aeruginosa*, iMO1056 (developed in 2008), Opt20896429 (2010), iMO1086 and iPae1146 (two minor updated versions of iMO1056 developed in 2011 and 2017, respectively), and all are for the strain PAO1. *Unfortunately, none of these four GSMMs incorporates the periplasmic space, and glycerolphospholipid (GPL) and lipopolysaccharide (LPS) biosynthesis is very poorly represented*. These shortcomings significantly limit their usefulness for antimicrobial pharmacology. Growth prediction with *iPAO1* on 190 carbon and 95 nitrogen nutrients outperformed all the previous models with an accuracy of 89.1%. Prediction of the essential genes for growth on rich media achieved a high accuracy of 87.9%. Specifically, the significant advantages of our *iPAO1* include: (1) incorporation of the periplasmic space; (2) addition of detailed GPL and LPS biosynthesis pathways supported by our own metabolomics and lipidomics data; and (3) significant expansion of the modelling scale with a high prediction accuracy. For the first time, metabolic simulation using *iPAO1* showed that lipid A modifications exert limited impacts on bacterial growth and metabolism, but remarkably change the physiochemical properties of bacterial outer membrane. Modelling with transcriptomics constraints revealed a broad range of metabolic responses to polymyxin treatment, including reduced biomass formation, upregulated amino acids catabolism, induced tricarboxylic acid cycle, and increased redox turnover. Overall,

Department of Microbiology  
19 Innovation Walk  
Monash University  
VIC 3800, Australia  
Telephone: (+61 3) 990 39702 Facsimile: (+61 3) 990 29222 Email: Jian.Li@monash.edu  
Web: [www.monash.edu/pharm/research/areas/drug-delivery/labs/li-lab](http://www.monash.edu/pharm/research/areas/drug-delivery/labs/li-lab)

**Unintended recipient: please notify as soon as possible and destroy all pages received**



Professor Jian Li  
Head, Laboratory of Antimicrobial Systems Pharmacology  
Monash Biomedicine Discovery Institute

our GSMM approach has a significant potential in accelerating antimicrobial pharmacological discovery against Gram-negative 'superbugs'.

To the best of our knowledge, this study is the first to integrate antimicrobial pharmacology, computational biology, metabolic network and systems pharmacology to analyse large-scale datasets, in order to better understand the dynamic and complex nature of polymyxin killing and resistance. We believe this manuscript perfectly matches the theme of *GigaScience* and will be of broad interest to microbiologists, bioinformaticians and antimicrobial researchers.

We confirm that our submission comprises original and unpublished material which is not currently under consideration for publication elsewhere, and has been approved by all authors. Thank you for considering our work for publication in *GigaScience*. We look forward to your correspondence.

Yours sincerely,

A handwritten signature in blue ink, appearing to be 'Jian Li'.

Jian Li PhD

A handwritten signature in blue ink, appearing to be 'Falk Schreiber'.

Falk Schreiber PhD
